# Supplementary material for: Genome-Wide Identification and Analysis of the VQ Motif-Containing Protein Family in Chinese Cabbage (Brassica rapa L. ssp. Pekinensis)
Source: Int J Mol Sci. 2015 Dec 2;16(12):28683–704. doi: 10.3390/ijms161226127 (PMC4691074; doi:10.3390/ijms161226127)
Supplement: Supplementary file 1 [file ijms-16-26127-s001.xlsx]

## Sheet: Table S1
Table S1 The coding sequences of BrVQ genes
>BrVQ1-1(Bra025998)
ATGTCTAGAGTGAGATCTGAGCCGATGAAGGTTGTCTTCATTAACACACAGTACGTCCAGACAGATGCTCGTAGCTTCAAGACGGTTGTTCAAGAACTCACCGGTAAAAACGCCATCGTCGCTGACGGTCCTTTCGAGTTCTCAAGCCATGGTTACGGCAGCAAAGACTCGTCACCACAGTTTTCCGGAGGTGGCGGAAGAGAAGCAGAAGGAGGTGTAGAGACGACGGAGTTCGATAGCTTTTTCAGGGAGATGCCTCCGGTCGGCGAATTGTACAATCTATGGTCAGAAAGTTAA
>BrVQ1-2(Bra016616)
ATGTCTAGAGTTAGGTCTGAGCCGATGAAGGTTGTCTTCATTAACACACGGTACATCCAGACAGATGCTCGGAGCTTCAAGTCGATTGTTCAAGAACTCACCGGTAAAAACGCCGTCGTCGCTGAGGGTCCTTTCGAATTCTCCGCTCAAGGGTACGGTGGAAAAGATTCATCACATCAGTATTTTGGCGGCGGAAGAGAAGCAGAGGGAGGTGTAGAGACGACGGAGTTCGATAGATTTTTTAGGGAGATGCCTCCGGTCGGCGAATTGTTTAATCTATGGTCAGAAACTTGA
>BrVQ3-1(Bra025892)
ATGGATAATAAATCTCCAAGATCAAAAGAAATCTTGGGACCAAGACCAACTCCATTGAAAATCCGTAAAGACTCTCACAAGATCATCAAGAAGCCACCACTAGCGCCACAACCACTACAATCACAACCACCGCAGCTACACGAGCAAGAACCATCACAACTATTGCCTCCACGCGGTCCAGTGATAATATACACTGTATCTCCCAAGATTATACATACACATCCTAATAACTTCATGACATTGGTTCAACGTCTCACAGGCAAAACCTCTACCCCCACAATTCCATCCTCCTCTTCTCCATACCCCTTAGCACTAGACTACACATCTGCATCAAGAGACACGTCAGCAGTGTTCGATGCATCCCGTGGTTCGATATCTCCGGCGGCTAGGTATGCTGCG…
>BrVQ3-2(Bra012276)
ATGCAATCACAACAGCCACGTGGTCCGGTGATCATATACACCGTATCTCCCAAAATTATCCATACACACCCTAATAATTTCATGGGACTGGTTCAGCGTCTCACAGGGAACACCTCTGCTTCTACAGCCTCATCTTCGGTGTCTCAATCCATATTAGCACCAAACAACATGTCAGCAACGGTAGATACATCCTGCAGTTCGCTATCTCCGGCGGCTCGGTATGCTGTGATGGAGAAAGATAATGCCTCAAACGAAGTAGGGTTTGTAGGTGGTGTAGAGACCACTGATCAATCTTATTATTATCATCATCATCAAAACCGAGTTATGGAAATCCCAAATTCTTACAATGGTGGGATTTTACCTCCGGACCCCACTTCGCTGCCGTTGACATCGCAGGAG…
>BrVQ4 (Bra030082)
ATGGAGAGATACAAAGATGCTTCAATGAATCTGATTCCATCTCCTCGATGCCACAACAACAACAACAGCTGCAGTATGAGCAGCAGCACTGAGAGCAACAACAAACCACCCACAACTCCGACCCGACAGGTAACCACTAGATCCGAATCCGGAAACCCATACCCAACCACTTTCGTCCAAGCCGACACTTCTTCCTTCAAACAAGTCGTCCAGATGCTAACCGGATCCTCAGACAGACCCAAACAACACAACACCTCCTCTCTCAAACCCAACCCGACCCATCAACCCGACCCGAGATCCTCTCCTTCCCAATTCTCAATCCCTCCAATCAAAGCCGTAAACAAGAAACAGTCTTCCTCCTCCTCCTCAGGGTTCCGTCTCTACGAGCGCCGTAACTCG…
>BrVQ5 (Bra035492)
ATGAATCAGCGACCACGAAATGATTACATGAGAGTGAATAGGACTGGCAAGTACACTCGAAAGAGTATTTTCGATCAAGTACACACTAACGCTAACTCCATACCTCATCAGCCACGGCAACCGCAACTGAAAACGCAAGTGTACATCATTGACAAGGAAGACTTCAAAAGCATTGTTCAGCAACTAACGAGTAATCAATCATGTGAGTTTTTACCTCAAAACCTTCCAAATCGTCAGAAGAGTAGACCAGAGCCGACCTCACCAGTTCCTCTCAATGCCACAGGGGTTCATGTCTCATCGCATATGGGGTATATTGAAAGCTTACTTGAAGAATCATCGGACTCTAGTGGTGACAACTTCCAACAATCATTTGATGAGAATCAATCTCATATACAACCT…
>BrVQ8 (Bra033934)
ATGATTCCTACAAGATGCCATGAGCTCAGCGGCTCTCGTCCTCCGTCGCTTAAACTCACAGGAGAATCCCATTCCATCAAGAAAACGACTTCGTTCAACGTCTTCAAACAGTCACGGCGACATGGACGTGCAGCTCCCGTAGTCATCTACGCGCACTCTCCAAAGGTGATCCACACGCGTGCTGAAAACTTTATGGCCTTGGTTCAGCGGCTCACGGGTCTCGAAGGGATTAGAAGGCGTAACCCTAACGACGTCAACGAATCATCGTTGTCTGTGTTAACCACGGAAGAGGCCAGTGTCGGTACTGATGACACAAGTTGGGAGAGACATCAACAAAGGAAAAACCTAGTTGATATTCCATTGTATACGCCGAGCTCGATGGCCTTGTTTGGTTCTCCA…
>BrVQ9-1(Bra035028)
ATGGATAAGAGCTGCAACTCCTCCGGCGACTCAGCCTCCGTGACGAGTAGTACCGGCAACAATCATCACCTAAGGCAACTCAACAAGCTTTCTCATAAGATATCAAAACCAACAACAACCTCAACCTCCTCTTCTTCCATCTCCGCCGCCGTGAATCAAGAAACTGATCACCAATTTCCTCCTCCTCCTCCGCCGCCGCAACAGCAACCGCAGCATCAGATTAATCACGGCAATCTCCACCAGCACCAGCCACCTGTTTACAACATCAACAAAAACGACTTCAGAGACGTGGTCCAAAAACTCACCGGCTCGCCGGCTCACGAGCGGATCTCCGCTCCGCCGCAGCAGCCGGTTCACCACCCCAAGGCGCAGCAGAGCTCGCGTCTCCACAGGATCCGT…
>BrVQ9-2(Bra008356)
ATGGATAAGAGCTGCAACTCCTCCCGCGACTCTTCCGCCGTATCAGCCACCGCAACGAGTAGTACTGGTAACAACAATACAGGAGGGAACAGAGATCATCATTACCTGAGACAACTCAATAAGCTTTCTCATAAGATATCAAAACCAACAGTAGCCTCCTCCTCCTCGTCCGTCTCCGCCGCCGTGAATCAAGAAACTAGTCACCAACCGCTTCCTCCTCCTCCGCAGCAACCGCCAATTAACCACGGGAACCTCCACCAGCACCAGCCTCCTGTTTACAACATCAGCAAGAGCGATTTCAGAGACGTTGTTCAGAAACTCACCGGCTCGCCTGCGCACGAACGGATCTCTGCTCCTCCGCCGATTCACCACCCTAGGCCTCAGCAGAGTTCGCGTCTA…
>BrVQ10-1(Bra008359)
ATGTCTGGAAGAGGGAAAGTGAAACAGGAGCCAATGAAAGTTGTGTTCATTAACACACAGTACGTTGAGACGGATGCACGTAGCTTCAAGAATGTTGTTCAAGAACTCACCGGTAAGGATGCTATCGTGGCCGCCGGTCCTTACGAGTCTCCCTCCGCTTACGCTTACGATGGAGGTAATAAAAGTGGCCATGATACTAGACGGCTTTATGGTGGCGGTGGAAGAGGAGGCGTGGAGACGACGACGGAGTTTGATAGATTTTTCAAGGAGATGCCTGCCATGGAAGAGTTCTATAAGCTATGGTCAGAAAATTGA
>BrVQ10-2(Bra003642)
ATGTCTGAAAGAGGGAAAGTGAAACCGGAGCCAATGAAAGTTGTGTTCATTAACACACAATACGTTGAAACAGATACACGTAGCTTCAAGACTGTTGTTCAAGAACTCACCGGTAAGGATGCCATCGTAGCCCCCGGTCCTTTCGAGTCTCCATCCACTTCCGACGTCCGTTGTTACGGTGGAGGTAGTAAAATAGTCGAAGATTCCAGACGGAGCAATGGCGGTGGAGGAGAAGTGGGGACGACGACTGAGTTTGATAGATTTTTCAAGGAGATGCCTCCAATGGAGGAGTTGTATAAACTATGGTCAGATAATTGA
>BrVQ10-3(Bra035035)
ATGAAAGTTGTGTTCATTAACACACAGTACGTTGAGACCGATGCTCGTAGCTTCAAAAATGTTGTTCAAGAACTCACAGGTAAAGATGCCATAGTCGCCGCCGGTCCTTTCGAGTCTCCATCCACTTCCGACGACCGTTGTTACGGTGGAGGTAACAGAGTCGGTGAAGATTCGAGACGACCCTACGACGGCGGAGGAGCGGAGACGACGACGGAGTTTAATAGGTTTTTCAAGGAGATGCCTCCCATGGAGGAATTGTATAAGCTATGGTCTGAAAGTTGA
>BrVQ11-1(Bra035182)
ATGAGCCACCCGAACCACCACCAGCAGCCGCCGAGCTATGTCACTGACCCAAACACCATGTTCGTTCAAGCAGATCCTTCCAACTTCCGAAACATCGTCCAAAAACTCACCGGAGCACCACCGGAACTCTCCACAGCACAACAGAAGCTTCCTTTAACTCCGAAGAAACCAGCCTTCAAGCTCCACGAACGTCGTCAGTCATCCAAGAAAATGGAGCTGAAGATCAGCAACGACTCCTTCAGCCATTTCCACCGAGGGTTCCTGGTCTCTCCCGTCTCTCACCTGGACCCATTCTGGGCGCGCGTGAGCCCACATTCAGCGCGTGAGTATCCTCACCCACCAGCGGACAATGAAGAGCAAAAAGCCATCGCGGAGAAAGGGTTCTACTTCCTTCCGAGT…
>BrVQ11-2(Bra003566)
ATGAGCCACCAGAACCACCACCAGTTGCCAACCTATGCCACAGACCCGAACACCATGTTCGTTCAAGCAGACCCCTCAAATTTCCGCAACATCGTCCAAAAACTCACCGGAGCATCACCACCGGAACTCTCTGCCGTCTCCGCGGCACGACGGAAGCTTCCTTTAACTCCAAAGAAACCAGCCTTCAAGCTCCACGAACGCCGTCAAACATCCAAGAAAATGAAGCTGGAGATCAACAACATCACCGACGACTCTTTAAGCCATTTCAACAGAGGATTCCTCGTCTCTCCCGTCTCTCACCTCGACCCATTCTGGACGCGCGTGAGCCCACATTCAGCTCGTGAGTATCCTCACCCAACGCCGGACAATAAAGAGCAAAAGGCCATAGCCGAGAAAGGG…
>BrVQ11-3(Bra008473)
ATGAGCCACAAGAATCACCACTCCCAGCGGCCAAGCTATGCTACCGACCCAAACACCATGTTTGTTCAAGCAGACCCCTCCAATTTTCGAAACATCGTCCAAGAACTCACGGGAGCACCACCGGAACTCTCCCCCGTCTCCACCGCACAACATAAGCTTCCTTTAACTCCAAAGAAACAAGCATTCAAGCTCCACGAACGCCGTCAGTCATCCAAGAGGATGGAGCTGAAGATCAACAATGATTCTTTGGGCCAGTTCAACCGCGGGTTCCTCGTCTCACCGGTCTCTCACCTCGATCCATTCTGGACGCGCGTGAGCCCACAGTCAGCACGTGAGAATCACCACGCCATGCCGGAAAAGGAAGAGCAAAAAGTCATAGCTGAGAAAGGGTTTTACTTC…
>BrVQ12 (Bra039937)
ATGGAAGCTACTTCACAGCCTTGTTTCTCTCATAATTACCTTAGATCATCTGAAAACTACAACTCATCGCTCCATTCGACACGAAAGCAACCTGCAAAGCCATGGAAAAGACCCGTAACAGCTTCGCTTCAACGAATGCATCCCAGAGTTTACCGAGTCGAGCCTGTGAACTTCAAAGAGTTGGTTCAGAGGCTAACCGGCGCACCACAAGATCACGAGAGAGATGAGGTGCATCAAGTTGAAACTAAGCCACTACTCAAGGTGCAACACGGTCTAGTTGAGGTTAGGCAGCCACTCAAGATTTTCCGTGAAACAACAACTCAAGAGAACCCACTGGCGTTTGATCTGTCTCCTTCATCATCTCGTTTTTGGGAAGCTTTCCCTCTTCTCAGTTCTGCG…
>BrVQ14-1(Bra023004)
ATGGATAGGCCTCGACAGAATGATCACTTAGGTGTGAATAAGATTGGGAAGAACATCAGAAAGAGTCCCCTCACCCAACCCAGTGTCGCTGCTCATGCTAACTTAGCCGCTGAGGCTGCGAGGCCTCAAGCGCAGCCTCAGGTTTATAACATAAACAGGAGCGACTTTAGAAGTATTGTTCAGCAACTTACTGGCTCTCCATCACGAGAAAGCCTCCCTGGGCCTCCTCAGAACAACTCACCAAAGCCTCAGAATACCCGGTTGCAGAGAATTAGACCACCACCCTTAATGCAAATCAACCAGCCTGGGGCTCCTCTACATCATCATCATCCTCACAGCTTAATGGGACCGCCTCCACCCCAATGGCATATGCCACAAGTCACACAACAACAACAACAA…
>BrVQ14-2(Bra017329)
ATGGATAGGCCTCGACAAACTGATCATTTGGGTGTGAATAAGACTGGTAAGAACATCAGAAAGAGTCCCATCCACCAACCCAACTTCTCTGCAAATGCTAATGCCACTGCAAGGCCTCAAGCGCAGCCTCAGGTTTATAGCGTTAGCAAGAACGACTTCAGAAGCGTTGTTCAGCAGCTTACTGGCTCTCCTTCCCGTGAAAGCCTTCCTCGCCCTCCTCCTCAGAACAATAACTCACCGAGGCCTCAGAATACTAGGCTGCAGAGGGTTAGACCGGCACCTTTAACGGAGATCAACCGTCCTGCTCTTCCTCTCCCTACCATGCCTTTGCAACAGCGTCCTCACAGCTTCGTCCAACCGCCTTTCCCACAAGGCACACAACAACAACAACCAGTGGTG…
>BrVQ14-3(Bra005358)
ATGGATGGGCCTCGACAGAATGATCATTTGGGTGTGAACAAGATTGGGAAGAACATCAGGAAGAGTCCTCTTCACCAGCCCAACTTCGGTGCCAATGCTAATGCTGCGAGGCCTCAAGGGCAGCCTCAGGTTTATAACATAAGCAAGACCGACTTCAGAAGTATGGTTCAGCAGCTGACTGGCTCTCCGGCGCGTGAGAGTCTCCCTCGCCCTCCTCCGCAGAACAGCTCGCCAAAGCCTCAGAGCACGCGGTTGCAGAGGATTAGACCACCACCCGTGACGCAGATCAACCAGCCTGCGGCTCCTGTACAACATTATCCTCACGGATACGCTAGTGGGCCTCCACCACAACCTCGTTTGTTACAAGGCACACAACAACTTCAACAACAACCGATGATG…
>BrVQ15 (Bra016956)
ATGGTGACTTCGGAGGGGCTAGCAAGCGTCGAACCTTGGTTGTTATATCGACAAGGTTTCAACGTTGATTCTTGGTTGCTTCACGATACCTTCTCTCACGACAATGATCTGCTCGCCAAAGCTCTCCATAACACCGTCTCAGCACCACCACCACATACTCTCCCTCCCTCCCTTTTCTTCGATTCCTATAACCCTTCCTCAACTCACACCCTTTCCTCTAATGTCTCTGGTGGATCCAGTCAAGAAGTTGTTGGCGGAGGAGCTAAAAGAAAGCATAACTGCTTCCTCACCGAAGGTAAAGCCACGAAGCGCCGCCGCTCTCGCCCTTCCAAGAAACCTCAGACCACGTTCATAACCGCGGACCCGTCAAACTTCCGCCAGATGGTTCAGCAAGTGACC…
>BrVQ16-1(Bra000216)
ATGGAGTCATCATCAACGTTGCTCAAAAGCTCAAACCAGAGAAAGTCACCATCGTCTCCGACAAGGAAACCACCAAGGCAAAAGAGGAAGACAACGACGACCACGAGCAATAACAAACCCATCAAAGTCCGTTACATATCAAACCCGATGAGAGTGGAGACGTGTGCTTCTAAGTTCAGAGAGCTCGTTCAAGAACTGACCGGTCAAAACGCCGCCGATCTACCTCCGGGGCCCACAACTTTCGCCGCCAAAGATCCTCACAAGAAGGAGATTAATCCTGAGCCGTTGGATGAAGGGATTTGTGAGTATTACTCACCGATGGATGATGAAGTGTTTAATGCTCCGCAAATGTCGGCAGCTCTGTCTGCGTTTTTCTCGTCTGGGTTTTACAACGTGAAT…
>BrVQ16-2(Bra004604)
ATGAAGTCATCATCGGCGTTGCTCACAAGCTTAAACCAGATACAGCCATCTTCATCTCCGACGAGAAAACCACCGAAGCAAAAGAGGAAGGCAACGACGTCGAACGATAACAAACCCATCAAAGTCCGTTACATATCGAATCCCATGAGAGTAGAGACTTGCCCTTCTAAGTTCAGAGAGCTTGTTCAAGAACTCACCGGTCAAGACGCCGCCGAGCTACCTCCGGAGCCCACCACTTACGCCGCCGCAGATCCCCAACAAGAGGAGATAAATCCTGAGCCGTTGGAAGAAGGGGTCAGTGAGTATTATTCACCGCTGGATGAAGAAGTTTTTAGTGCTCCTCAAATGTCGGCAGGTCTGTCTGCGTTTTTCTCGTCTGGGTTTTACAATGTGAATGCC…
>BrVQ18-1(Bra004825)
ATGGAGGTTACTCAATATCATCAAAGTTTTAATGAAGGTTCGAGTTCTAGGGTTTCCATGAACAAGAACTCACAAGTAATATCCAAGATCAAGCCCAAGATTCGCATCATCCACATATTCGCTCCTGAGGTCATCAAGACTGACGTCAAGAATTTTCGTTCACTCGTCCAAAGTCTAACCGGAAAACCCACAGCCGGAGAAGTCAAAACCGATAAAAAGAGAGCCAACTCGAGAGTTTCGACGTCTCAAGAACCGGTTTGCAGAGATCATCAGCCGGTTAATCGGCTAACGGGTTTCACAGGTTTATTAGCAAACGGAGGAAACCATCAGGTGAAAGAAGAATGGGGATCTGGTGATCATAAGCGTACTTCCAACACAAACACTTACTTTGACCTAGAA…
>BrVQ18-2(Bra037658)
ATGGAGGTTACTCAATATCATCAAGGTAATTTTAATAAAGGTTCGAGTTCTAGGGTTTCCATGAACAAGAATTCACAAGTAATATCCAAGATCAAGCCCAAGATTCGCATCATCCATATATTCGCACCGGAGGTCATCAAGCCCGACGTCAAAAACTTCCGTTCCCTCGTACAAAGTCTAACCGGAAAACCAGCAGCCGTAGAGGTCAAAACCGGTAAAAGGAGTGCCAGACCGAGAATTCCCACGTCTCAAGAACCGGTTTGCGGAGATCATCAGCCGGTTAACAGGCGTACTAGTTTCACCGGTTTATTAGCAAACGGTGGAAACCATGAGGTAAAAGAAGAATGGGGATCCGGTGATCAGAATACTAGGAACACAAACACTTACTTTGACCTAGAA…
>BrVQ19-1(Bra027262)
ATGGAGACCACAACAAAACCAAACCAGTCTTCCACTACTTCATCATCAGCTTCCTCTTCCATCATCAATGGATCTTTACATCACCACATCATCACCAGATCTGATCATTACCCAACAACTTTCGTTCAAGCAGACACTTCCACTTTCAAACAAGTCGTCCAGATGCTAACCGGCACCTCCTCCCCGAGATCCCCAGACTCGCCGCGTCCTCCTCCCTCTCCTTCCGGCAAGAGTACTTTCGTGATTCCACCGGTCAAAACAACACAGCCGAAGAAACACTCGGGAAACAAACTATACGAGAGGAGATCGAACAACAGCAGCCTCAAGAACAGCCTCATGATTAACACACTCATGGTCGGAGGCGGGAACGGTGCCGGAAGTCCAAGATTCTCGCCGAGG…
>BrVQ19-2(Bra021096)
ATGGAGATTGCAACAAAACAAGGAGATTCAAGAAACCCATCTTCCACTTCTTGTTCATCAGCTTCCTCATCTTTACATCAACACATCATAACCAGATCTGATCATTACCCGACAACTTTTGTCCAAGCAGACACTTCCTCTTTCAAACAAGTCGTCCAGATGCTCACCGGAAGCTCCTCCCCGAGATCCCCAGACTCGCCGCGTCCTCCGACGACTCCTCCCGGCAAAGGTAACTTCGTGATTCCACCGATCAAAACAACACAGCCGAAGAAACACTCAGGAAACAAACTCTACGAGAGGAGATCTAACAACAACAGTCTCAAGAACAGCCTCATGATCAATACGCTCATGATCGGCGGCGGAAACGGTGCCGGAAGCCCGAGATTCTCGCCGAGAAAC…
>BrVQ20 (Bra037588)
ATGAACTCAACGTTCAACGACCACCATCACCTAAAGAGAGAGCCTAATGACAACTCCGGCGTCGGAATCATATATCCTCCGTCACCTTCTCCGCTGCTAAAACTAAACAAAGACTCCCACGTCATCAAAAAGCCACCCTCGCCGTCGTCTTCCTCCTCTACCGCCGCGAAGCCTCGCCAGCCGGTGATCATCTACACGAACACGCCCAAAGTTATACACACCAATCCTAAAGATTTCATGGCTCTCGTCCAAAAACTCACCGGAATGTCTCACTCCGAGGAAGATTCCGGCGGTAGCAGCAGCGCGGTAACGGATCGTGGAGGAAAATCAATCAACCGGAGTGTCTCTGATCTCACCGTTGATAGAAAAGTTAACCGGACTCGCTGCGGTGGAGGCGGC…
>BrVQ21-1(Bra037569)
ATGGATCCGTCGGAGTCTTTCGCCGGCGGCAATCCTTCCGACCAACAGAACCAGAAACGTCAGCTTCAGATCTGTGGTCCTCGTCCCGCACCTCTCAGCGTCAACAAAGACTCCCACAAGATCAAGAAACCTCCTAAACACCCTGCTCCTCCGCCTCAGCACCGCGACCAAGCTCCGCTCTACGCCGCTCGAGAGCCGGTGGTTATCTACGCCGTTTCCCCCAAGGTCGTCCACACCACAGCCTCGGATTTCATGAACGTCGTCCAGCGTCTCACCGGCATCTCCTCCGCCGTCTTCCTCGAATCCGGTAACGGCGGAGATGTGTCTCCGGCGGCGAGACTCGCCTTGACGGAGAATGCTAGCCCCAGAGGAGGAAAAGAACCGGTGATGGCGGCTAAA…
>BrVQ21-2(Bra022345)
ATGGATCCGTCGGATTATTTAACCGGTAATAATCCTTCCGACCAACAGAACCAGAAACGACAGCTACAGATCTACGGTCCTCGTCCTTCCCCTCTCAGCGTCCACAAAGACTCTCACAAGATCAAGAAACCTCCCAAGCACCCTGTTCCGCCTCCTCAGCATCATCACCGCGACCAAGCTCCGCTCTACGCTCCTCGAGAGCCGGTGGTTATCTACGCCGTCTCCCCGAAAGTCGTGCACACCACAACCTCCGATTTCATGAACGTCGTCCAGCGTCTCACCGGGATCTCCGCCGGGGTCTTCCACGAATCCGGAAACGGCGGAGATGTATCGCCGGCGGCAAGACTCGCCGCGACGGAGAATGCTAGCCCAAGAGGAGGAAAGGAACCGACGGCGGCG…
>BrVQ21-3(Bra001716)
ATGGATCCGTGGGAGCACTTCGCCGGCGGTAATCCTTCCGATCAACAGACTCCAAAACGTCAGCTTCAGATCTGTGGCCCTCGTCCTTCACCTCTAAGCGTCAACAAAGACTCTCACAAAATCAAGAAACCTCCCAGGCACCCTGCTCCACCTCCTCAGCATCACCGCGACCAAGCTCAACCGTACGCTCCTCGAGAGCCGGTGGTTATCTACGCCGTCTCGCCGAAAGTCGTGCACACCACAACCTCCGATTTCATGAACGTCGTCCAGCGTCTCACCGGGATCTCCTCCGAGGTCTTCCTCGAATCAAGAAACGACGGAGATGTATCACCGGCGGCGAGACTGGCCGCGACGGAGAATGCTAGCCCGAGAGGAGGAAAGGAACCGGTGGAAATCTCG…
>BrVQ22-1(Bra023849)
ATGGCTAACAACCCAAACGATTGGTCTCCGTTCTACAACAACAATCAAACTTTCTTCACAACTTCCACCATCACTTCAACCGCCGTCACAACCACCACAACTGCTTCTCCCTCCGGTGAAGCCACCTCCATGGACTCTCGTCTGAGTCCTGAAACCGGTCGTGTAACCAAACCGGCACGTAAAAGATCAAGAGCCTCACGTAGAACACCAACAACACTTCTCAACACCGACACATCCAACTTCCGTGCCATGGTTCAGCAATACACGGGCGGTCCATCCGCTATGGCTTTCGGGTCCGGTAATACTACTTCCGGTTTTAGCCTCACCGCTTCGTCGGATCCATCCGCCGGATCTTCTCAGCAAGTTCCTTGGCAATACAGTTACCAGCCACACGCGGGG…
>BrVQ22-2(Bra041035)
ATGGCTAACTCAAACGATTGGTCTCACCTCTACAGCAACAACCAAGCCTTCTACACAACTTCCACCATCACTTCAACCGCCGTCACAACCACCACAGCAGCTTCTCCCTCCGGTGAAGCCACCTCCATGGACTCTCGTCTTAGTCCAGAAACAGGCCGTGTAACCAAACCGGCACGTAGAAGATCAAGAGCCTCACGTAGAACACCAACAACACTTCTCAACACGGACACATCAAACTTCCGCGCCATGGTTCAGCAGTTCACGGGCGGTCCATCCGCTATGTCTTTCGGGTCAGGTAATACCACTTCCGGTTTTAGCCTCACCTCTTCGTCGGATCCATCCGCCGGATCTTCCCAACAAGTTCCTTGGCAATATAGTTACCAGCCTCACGCGCCGCCT…
>BrVQ23-1(Bra007265)
ATGGACTCATCGACGTTTCTCGCCGCCACAAGCTTAGACCAGGGAAAACCATTTCCGGTTTCGAGACAGCTATCAAAGCAAAAGAAGAAGACGGCTTCAGCCAACAAAGCCATCAAAGTGCGTTACATATCAAACCCCATGAAAGTCAAAACATGTGCTTCCAAGTTTAGAGAGCTCGTACAAGAGCTCACTGGCCAAGACGCTGTCGATCAACCGGAGCCCGTGTTCTCCCCCTCCACCGTCTCCGACCTCAGCCCTTCCCCGCCGCCGCCGGAGAATCTTGCGCCACGTGTTCTTGAGCAAGAGCCGTTCGATGATCGGGTGTGTGAGTACTTTGAGCCGTTGGATGGTGAAGAGATGTTTTTGCCTCAGATGTCGGCAGGTTTTTCTGGATTTTTT…
>BrVQ23-2(Bra014675)
ATGAAGTCATCATCATCATGGACGTTTCTCACGACCACAAGCTTAGACCAGAGAAACCCATCTCGAGTTTCGAAAAAAACACCGAAGCAAATGAAGAAGACGGCTTCAAGGAACAAACCCATCAAAGTGCGTTACATATCGAACCCCATGAGAGTTAAAACTTGTGCGTCCAAGTTTAGAGAGCTCGTACAAGAGCTCACCGGCCAAGACGCCGTCGATCTTGAGCTTGAGCCCGAGTTTTCCCCTTCTGCGGTATCCGACGACAGCTCTTCTCCGCGGCCGCCGGAAAATCTTGCGCCACGTGATCTTCATCAGGAGCCGTTCGATGATCGGGTGACTGGCTACTATGAGCCGTTGAATGGGGAAGAGATGTTTGTGTCGCAGTTGTCGGGAGGTTTT…
>BrVQ23-3(Bra014674)
ATGAAGTCATCATCATCATCGTCATGGACGTTTCTCACGACCACAAGCTTAGACCAGAGAAACCCATCTCCGGTCGTTACATCAAAGCAAATGAAGAAGACAGCTTCAAGGAACAAACCCATCAAAGTGCGTTACATATCAAACCCCATGAGGGTCAAAACATGTGCGTCCAAGTTTAGAGAACTCGTACAAGAACTCACCGGCCAAGACGCCGTCGATCTTGAGCTTGAGCCCGAGTTTTCCCCTTCCGCGGTATCCGACCACAGCCCTTCTCCGCCGCCGCCGGAGACTTTTGCGCCACATATTCCTCATCAGGAGCCGTTCGATGATCTGGTAGCTGGCTACTATGAGCCGTTGGATGGGGAAGAGATGTTCTTGTCGCAGATGTCGAGAGGTTTT…
>BrVQ24-1(Bra007279)
ATGGCGTCGTCTGATGGATTAGCGAGCGTTGACCCTTGGTCGTTCCGACAAAGCTTCAACATCGACTCGTGGTTACTCCCTGATCCTTTCTCTCACGACAGTGACGTACTCGCTAAAGCTCTTCACAAATCCATCTCCGACCCTCTCTCTCCTTCAGCTTACTTCGATTCCGCCGCCGTCTCCGACCTCTCACCTCCTCAAACCGTCTCTAACGTCTCCTTCGGCTCAGATCCGGAGATCGCCGGCGGTGGCGGTGGTGGGGCGAAGCGGAAGCGTGGTCCTGGTGTTGCCGGCGGTAAACCGGCGAAGCGCCGTTCTCGAGTTTCCACCAAGAAGTCTCAGACGACGTTTATAACGGCGGACGCGGCTAACTTCCGGCAGATGGTTCAGCAAGTCACC…
>BrVQ24-2(Bra014665)
ATGGCGTCGTCTGATGGATTAGCGAGCGTTGAGCCTTGGTCGTTCCGACAAAGCTTCAACATCGACTCCTGGTTACTTCCTGATCACGACAGTGACATACTCGCCAAAGCTCTTCACAGATCCATCTCCACATCCACACCCACCGATCCTTTTTCTCCCTCGGCTTCCTTCGACTCCGCCGCTGTCTCCGATCTTTCTCCTCCGCAAACCCTCTCTAACGTATCCTTCGCCTCAGATCCGGACATCTCCGGCGCTGGTGGGGCGAAGCGGAAGCGTGGTCCTGGCGTCGCCGGAGATAAACCAGCTAAACGCCGATCTCGAGTCTCGACGAAGAAGTCTCAGACAACGTTTATTACGGCGGACGCGGCTAACTTCCGGCAGATGGTTCAGCAAGTCACC…
>BrVQ25-1(Bra007373)
ATGGAAGCCACGATCTTCAAGGGCAGAAGAACCTCATCATCAGCCCTAGCGATGCACAAACAGTCATACTCAATAACCAAATCAAAGCCAAAGATACGTATCATTCACATATATGCACCTGAGATCATCAAGACCGACGTTGCCAACTTCCGTGAGCTCGTGCAAAGCCTCACCGGCAAACCAGAAGACCATGGCGTTTCCAAGACAAAGCCAAGAAGAGATACTCATCGTCTACATCATCGTCAGGTCCTAGACATGACCAACGCGGAGAAACTAAGTGAATCGGAACATTATGATCAAGGGTTCTGCTTAAACTCAGAGATGGAAGAGATCTCGATGACTTGGAACGGTAACAACGGTGTTGGTGAGAGCTCCGGAGGGTTCTTGAATGGTATGGGA…
>BrVQ25-2(Bra014594)
ATGGAAGCCACCATCTTCAAGAAAACAAGGAGCTCATCATCAACCCTAGCGATGCATAAACAGTCATACTCAATAACCAAAACAAAGCCAAAGATCCGTATAATTCATATATATGCACCTGAGATCATCAAGACCGACGTTGCCAACTTCAGAGAGCTCGTCCAAAGCCTCACAGGCAAACCAGAAGACCATGGCGTTTCCAAAACAAAACCAAGAAGAGGTACTCGTGGTCAAGTCCAAGACATGATCAACAAGGAGAAGCTAAGGGAAGCCGAGCGTTGTGATGATCAAGGGTTCTGCTCAAACTCAGAGATGGAAGAGATGTCGATGACTTGGCACGGTGGTAATAACTGTGGTGAGAGCTCAGGAGGGTTCTTGAATGGTTTTGGAGATTTTGGA…
>BrVQ26-1(Bra007505)
ATGGAGAGAAGTTCAATGAAAGCTAAGCACGATCTTGATCATCTTCCTCACCAAAGCTTTTATGGAGATTACTCAAAAACTTTGGTTCCCAAGAACAAGAACTCCCAAATAATTACCAAGATCAAGCCTAAGATCCGTATCATACATATATTTGCGCCGGAGATCATCAACACCGACGTCAAGAACTTCCGTACACTTGTCCAAAGTCTGACCGGAAAAACGGAGATAACCAAAACAAGTCCTAAGAAAAAGACAAATATTCCTGCGCCACAGCCTCCACCTCAAGAATCCGGCCAAGAACATACGGCGGAGCTGGTGAACAGTATCATAGGGAGCCACGTGGTGAAAGAAGAATGGAGATCAGGTTCGAACACAAACACTTACTTTGATTTAGATGGT…
>BrVQ26-2(Bra014514)
ATGAAGGCTGAATACGATCTTGATCACCTTCCTCATCAAAGCTTTTATGGAGATTATTCAAAAACATTGGTACCCTTGAACAAGAACTCCCAAATAGTTACCAAGATCAAGCCTAGGATCCGAATCATCCATATATTTGCGCCGGAGATTATTAACACCGACGTCAAGAACTTCCGTACACTCGTCCAAAGTCTGACCGGAAAACCGGATATCACCAAAACCGGTTCTAGGAAAAAGACAAGAAGAACGAATATTCACGCGCCACCGCCTCCACCTCAAGAATCAGGCAAAGAACATACGGCGGAGCATGTTAACATGATTATAGGGAGCCATGTGGTGAAGGAAGAATGGGGATCAGGTTCAAACACAAACACTTATTTTGATTTAGATGGTTTGATT…
>BrVQ26-3(Bra003400)
ATGGTGAGAAATTCAATGAAGGCTGAGTACGATCTTGATCATCTTCCTCATCAAAGCTTCTATGGAGATAATTCAAGAACTTTGGTTCCTATGAACAAGAACTCCCAAATAATCACCAAGATCAAGCGTAAGATCCGTATCATCCATATATTTGCACCGGAGATTATCAATACTGATGTCAAGAACTTCCGTACACTCGTCCAAAGTCTGACCGGAAAACCGGAGATCACCAAAACGGGTTCTAAGAAAAAGATAACGAGAACAAATATTCCTGCGCCACCGCCTCCACTTCAAGAATCCAGGTCAGAACATACGGCAGAGCCGGTCAACAGTTTCATAGGGAGCCACGTGGTGAAGGAAGAATGGGGATCATGTTCAAACACAAACACTTACTTTGAT…
>BrVQ27 (Bra039565)
ATGGCCAACCCCAACAACGACTGGTCTCAATTCTACAACAAACAAACCTTCTTCCCCACCACAAGCACCACCACGACCACCGCTTCCACGTCAGCTGATTCTTCCGTTAACCCTGAAAGCCGCCGTGTTTCAAAGCCAACTCGTCGGAGGTCTAGAGCCTCCCGCCGTACACCCACTACACTTCTCAACACCGACACAGCCAACTTCAGAGCCATGGTCCAACAATTCACCGGCGGTCCATCCGCCATGGCTTTCGGTTCACCGTCATCTGGTTTTAGCCTCACCTCGTCGGGACCCACAGCCGGAGCTTCTTCGGTCGGCTATCAGTACGCTAATTTCCAGAACCAAGTTGCTCACCACGAAGTATTGCAACAACAACGACAGTACATGGTCTCGTCA…
>BrVQ28 (Bra013438)
ATGAACAACAACTCGTCTAGAGCAGGCCAGTGGTTACAACACTATGAACCACACCAAGTTCAAGAGCTTAGTCCATGCTTCAATGGTATTAATATGATGCCATCATCCCTCGGAGACGGCGGTGGTATTGTGGAGGCTCATGAAACGTCTGGAAGAAGATCTAGGGCTTCGAGGAGAGCCGTACCAACGACTCTTCTGAACGCAAACCCTAGCAATTTCCGAGCTCTTGTGCAGAAATTCACTGGACGCTCTTCTGGTGGTGAATCCAACCGTAGAAGGGGTCCGGTGACTCTGGATTTCGGTTCTCCAACTACAATCTCGAAAGAAGCTATCTTTCCGGTCTCCGGAGATCGAAAGAGTTATGGTCACGATCATGTGCTTAACCAGCATGTGAATAAC…
>BrVQ29-1(Bra010608)
ATGTCTCAGAGTTACCTTAATTCTCAAGAAACCGCTACACAGGCAACAAAAGATTACCTAGCTTCACTCCATTCGTCCAGAAAGCAACCTTCAAAGCCCTTGAAGAGACCTATATCATCGCCTTTGAACCCCATGCATCCACACGTTTACAGAGTCGAGCCAGTAAACTTCAAAGAGTTGGTTCAGCGTCTGACTGGTGCTCCTGAGCACGAGCCTGTGGCTAACCCGTTCAAGAGTTTGGATGATGCAGCAAAGGATAGTTCTCCATCCTTCGCGTTTGATCTATCATCGTCATCATGGGGAGACTTATCACTTCGGAATCCTGCAAATATCTCCAGATGGTAG
>BrVQ29-2(Bra017849)
ATGTCTCAGAGTTACCTTAGTGCCCAAGAAACTAATACACTGACAACAAGAAATTACCTAATGTCACTCCATTCGACCAGAAAGCAACCTTCAAAGCCAATGAAGAGGCCTGTATCATCGCCTTTGAAGTCCATGCATCCCCAGGTTTACCGAGTCGAGCCAGCAAACTTCAAAGAGTTGGTTCAGAGGCTAACTGGTGCACCTGAGCACGATGATGTGGTTAAACCCTTCAAGAGTTTTGATGATTTGGCAAATGAGAGTTCTTCATCATTAGCATTTGATTTATCATCCTCATCATGGGGAGATTTATCACTTCAAACTCCTGCAAATCTCTCCAGATGGTAG
>BrVQ30-1(Bra010666)
ATGGAGTCCGGTAATAGTAGTAGCATGCAATCTTCAAGCGGCGGTGGAAGAGGAGGCGAAGAAGAGTACGATTCACGCGCCGTCGATCAATCCATCTCAGCCTTCGACCACCACAATCACCACGTACCATCCCTACCTCCGCAGCAACAAAGCCACCTTAACCTCCTCCACTTCGACCACAACAGCGACAACAACTCTCTAATACTACCAAACTACTTCAACAACAACACGTTCTTACCCATAAACCAACAACCCGACCCGACATCTCAACCCGACCTCCGTACCTTCTCCGCCACATCATCATTCCCTCCTCCTAACAACATAGGAGTAACCAAGAAACCCAAGAAAAGATCACGAGCATCAAGAAGAGCACCAACGACGGTTCTAATGACGGAAACT…
>BrVQ30-2(Bra011838)
ATGGAGTCTGGTAATAGTAGTAGCATGCAATCTTCAAGCGGAGGAGGAGGAGGAGGAGAAGAATACGATTCTCGCGCCGGTGATCAATCCATCTCAGCCTTCTTCGACCACCACAACCACCACGTGGTATCTTTACCTCGGCCACAACAAAACCACATCAACCCCCTTCACTTCGACCACAACAACTCTCTATTACAACAAAATTACTTCAATAGTAACAGCAACGGTACCTTCTTGCCCGTAAACCAACAATCCGACCCGGTTACTCAACCTGAACTCCGAACCTTCACCACCACGTCATCAGTTCCTCCTAACAACGTAGGAGTAACCAAGAAAACCAAGAAAAGATCTCGAGCATCAAGGCGAGCACCAACGACGGTTCTAAAGACGGATACTTCG…
>BrVQ31 (Bra005995)
ATGAATAACCAAGGAAGTCAGAACGTTGCAACTTGCAAGCCCGTCACTACATTTGTCCACACTGACACCGACACTTTCAGAGAAGTCGTGCAGCGCTTGACAGGTCCATCAGAGAGCAATGCTGCAGCAATACCAGAAGCAACAGTGATAAAAACCGCCATTCAAAGGAAGCCCACTTCTAAGCTCCATGAGAGAAGGCAATGCATGAGGCCAAAGCTTGAAATTGTCAAACCTCCTCTAAGCTTTAAACCCACTGGTAAGAAACCATTATCTAAATCTGGTATTACCAACCTTTTAACAGATCCACTAAGCACCTCTTCTTCATTGGTCTCTAACTTGTCCTTGATAGAAGGAGATAAAGCAGATCCAGATAGTTGTACAACAAACAACGAAGAAGAG…
>BrVQ32-1(Bra022063)
ATGGATGACCAGAGAAATAGTGATAATCATCATCAGCATCATCATCTTGGTGTGAATAAGATTGGGAAAAACATCCGTAAAGATTCATCAAACCAGCAAAATCAACAACAGAATCCTCAAGCTTTGTTTTTTAACATCAACAAAACCGATTTTAGATCCATTGTTCAACAGTTAACCGTACTCGGTTCAGCTTCTTCAGTAAATCCTCCACAGTCAACAAACCCACCAAAACCTCCAAATTCAAGGTTGGTCAAAGTTAGACCGGCTCCTTTGACTCAAGTCAACCACCATCCACCTCCACCTCCGGTTCAATCCGATCCAATAGCCGCTGAAACGGTTCAGCGTAATAACCAATTATCGGTTAACCCGGCCGAATCTCCAATCTCCGCTTATATGCGT…
>BrVQ32-2(Bra024996)
ATGGATGATCACAATAATGATAATCATCATCATCATCATCTAGGTGTGAATAAGATGGGAAAAAACATCCGTAAAGAGCCATCAAACCAGCAAAATCAACAACAAAATCCTCAAGCTTTGGTTTATAACATTAACAAGACCGATTTCAGATCCATTGTTCAACAGTTAACCGGACTCGGCTCAGCTTCTTCTGTCAATCCTCCACAGTCAACAAACTCAAACCCACCAAAACCTCCAAATTCACGGTTGGTCAAAGTTAGACCAGCTCCTTTGACTCAAGTAACCCGCCCTCCACCTCCACATCCAGTTCAATCGAATCCAATGGCCTCTGAACCGGTTCAACCTATTAACCAATTATCAATCAACCCGGCCGAATCTCCAATCTCGGCTTATATGCGT…
>BrVQ33-1(Bra003032)
ATGCAAAACCCCCCTCCCATAATCTCATCTCCTAGGTTTCTGCAGCCTCAGACAAGATCTCTTCCTCATCATGAGCAGCATCAACATCTGTCTAATCCTTACCCAACAACATTTGTTCAAGCAGACACTTCCACTTTCAAACAAGTTGTTCAGATGCTAACGGGCTCCTCTTCCACCGATACCAACACCGGAAAACACCACGAAGCTCCTTCTCCGGTGAACAACAACAAAGGAGGTTTCTCAATACCACCCATCAAGAAAACCAACAGCTTCAAGCTCTACGAAAGAAGACAAAACAATAACAACAACATGTTTGCTAAGAATGACCTAATGATCAATACTTTAAGGCTTCAAAACTCTCAGAGGTTGATGTTCTCAAGCGGAAACAATGTTCATCAA…
>BrVQ33-2(Bra022675)
ATGGAGGTCTCATCAACATCATCCATCTGTTCAAAACCAGAACAAATCATGCAAAACTACCCTCCCATAATCACATCTCCTAGGTTTCAGCCTCAGACAAGATCTCCTTCTCATCATCATCATGACCAACATCAACATCTCTCAAACCCTTACCCAACAACATTTGTTCAAGCAGACACTTCCACTTTCAAACAAGTTGTGCAGATGCTGACCGGCTCCTCCACCGATACCAAAACTGAAAACCACCACAAAGCTCCTTCTCCGGTGAACAACAACAAAGTAGGTTTCTCAATCCCACCCATCAAGAAAACCAACAGTTTTAAACTCTACGAAAGAAGACAAAACAATAACAACATGTTTGGTAAGAATAATTTAATGATCAATACTTTAAGGCTTCAA…
>BrVQ34-1(Bra024362)
ATGGATTCCGGCAACAGTAGTAGCATGCAATCTTCAAGCGGTGGTGGTGGAGACCAAGAAGAGTACGACTCACGCGCCGATCAATCTCTCTCTGCTTTGTTTAACAACAACGCGGCCACCGGCTCTTCCAACATCGCCGGTCAAACACAGCTTGACTCTCTCATGGCTAACTATTTCAACACCGGGTGGTCAACGGATAATCCTCTCTGGTCAACAACAACTTCAAATCCCACCGACGGCTCTAGACCACAACCACCACCGGTGCCATCAGAACCAGTCTTCTTCACAAACACAGTTCAAGAAAATCTGAGAGTAGTCTCAAACACAAACACAAACACAAACACAGACACAAACACAAGTAGTCCCATTGGTTCTGTCCCTACCGACAAGAAAACAGGT…
>BrVQ34-2(Bra037806)
ATGGATTCAGGCAACAGTAGTAGCATGCAATCCTCAAGCGGTGGTGGTGGAGACCAAGAAGAGTACGACTCACGCGCAGATCAATCAATATCCGCTTTGTTCAACAACTCAACCACCGTCTCCGCCAACATCGCCGGTCAAACACAGCTTGACTCCCTCATAGCTAACTATTTCAACACCGGCTGGTCAACAGATAGTCCTCTATTGTCAACAACGACCATGAAGCCTACCGATGGCTCTAGGCCACCACCACCACCAATCTTGTTCACAAATCCACTTCAACAAGATCTGAGAGTAGCTTCGGACACAAACACAAGTAGTCCCATATGTTCTGTCCCTACCGACAAGAAAAACGGTCTGGCCACAACAAGGAATCTAAAGAAGAGATCTCGAGTCTCG…
>BrVQ34-3(Bra031876)
ATGGATTCCGGCAACAGTAGTAGCATGCAATCTTCAAGCGGTGGTGGTGGAGGAGAACAAGAAGAGTACGACTCACGCGCCGATCAATCAATCTCTGCTTTATTCAACAACAACAACGCAACCACCGCCGGTCAAACACAGCTTGACTCTCTCATAGCTAACTATCTCAACACCGGTTGGTCAACAGATAATCCACTCTGGTCAACAACGACCATGAAGCCCACTGATGGCTCTACACCACCAGTCTTCTTCACAAACCCACTTCAACAAGATCTGAGAATAGTCTCAAACACAGACACAAGTAGTCCCATTAGTTCTGTCCCTACCGACAAGAAAAACGGTCTGGCGGTGACAACACGGATTCCTAAGAAGAGATCTCGAGTCTCGAGACGGGCACCT…
>BrVQ35 (Bra006328)
ATGAAGGAAGGGGGTTTCTTAAGCTTGTCGTACAGCTTTTGTCTTGGAAACATCATCGGGACGTTGCGGGAGGGAGGTCGGGGGGGGGGAGAGGCAGGGGCGCACGGCGGCGCGGGAGGCCAGCGCGGCGGCGCCGGAGGGGCCTGGGGGACGGCGAGGCGGAGAGGGAGAGGGGAAGGGCATAACGCCATGCTCAGTCTGAGCGTTCTCTCGCTACCATCTAAAAGGCAACGTACTGCGTACCCTCTTCCATCCACGTCACCGACAACGCACAACAATGGTTCTGTATGTGTTGACAAACTACCTGAAGGGATTAATGAGATGAAGATTAAAGATGATAAGGAAATGGAAGCAGCTGTGGTCGATGGGAATGGAACTGAGACAGGTCACATCATTGTT…

## Sheet: Table S2
Table S2 The amino acid sequences of BrVQ proteins
>BrVQ1-1(Bra025998)
MSRVRSEPMKVVFINTQYVQTDARSFKTVVQELTGKNAIVADGPFEFSSHGYGSKDSSPQFSGGGGREAEGGVETTEFDSFFREMPPVGELYNLWSES
>BrVQ1-2(Bra016616)
MSRVRSEPMKVVFINTRYIQTDARSFKSIVQELTGKNAVVAEGPFEFSAQGYGGKDSSHQYFGGGREAEGGVETTEFDRFFREMPPVGELFNLWSET
>BrVQ3-1(Bra025892)
MDNKSPRSKEILGPRPTPLKIRKDSHKIIKKPPLAPQPLQSQPPQLHEQEPSQLLPPRGPVIIYTVSPKIIHTHPNNFMTLVQRLTGKTSTPTIPSSSSPYPLALDYTSASRDTSAVFDASRGSISPAARYAAMEKANVSNELGFVGGIESTNQYYQHDHHQNRATERAGILSPGPASLPQISPDFFSTVGGSDPQGFSSFFNDFSSILQATPTIPSPSSMDLFTNFFDC
>BrVQ3-2(Bra012276)
MQSQQPRGPVIIYTVSPKIIHTHPNNFMGLVQRLTGNTSASTASSSVSQSILAPNNMSATVDTSCSSLSPAARYAVMEKDNASNEVGFVGGVETTDQSYYYHHHQNRVMEIPNSYNGGILPPDPTSLPLTSQELLSTVAPPNDPQGLSAMFSDFNSILQTSPPKIPSPSMDLFNNFFDS
>BrVQ4 (Bra030082)
MERYKDASMNLIPSPRCHNNNNSCSMSSSTESNNKPPTTPTRQVTTRSESGNPYPTTFVQADTSSFKQVVQMLTGSSDRPKQHNTSSLKPNPTHQPDPRSSPSQFSIPPIKAVNKKQSSSSSSGFRLYERRNSMKNLKINPLNPVFNPVNSAFSPRKPEILSPSILDFPSLVLSPVTPLIPDPFNRSGSSSQSPDEAEEKAMKERGFYLHPSPATTPMDSEPRLLPLFPVTSPRVSGSSTDSSS
>BrVQ5 (Bra035492)
MNQRPRNDYMRVNRTGKYTRKSIFDQVHTNANSIPHQPRQPQLKTQVYIIDKEDFKSIVQQLTSNQSCEFLPQNLPNRQKSRPEPTSPVPLNATGVHVSSHMGYIESLLEESSDSSGDNFQQSFDENQSHIQPQVYSNGDNFQQTFDKYQSHMQPMSYSNGPKPVMTTTLPTPWFNGSPQQIDSAYSLQSTRVEYPQPLTPNFSFSSVTQPGFFDPDLRRF
>BrVQ8 (Bra033934)
MIPTRCHELSGSRPPSLKLTGESHSIKKTTSFNVFKQSRRHGRAAPVVIYAHSPKVIHTRAENFMALVQRLTGLEGIRRRNPNDVNESSLSVLTTEEASVGTDDTSWERHQQRKNLVDIPLYTPSSMALFGSPTQRL
>BrVQ9-1(Bra035028)
MDKSCNSSGDSASVTSSTGNNHHLRQLNKLSHKISKPTTTSTSSSSISAAVNQETDHQFPPPPPPPQQQPQHQINHGNLHQHQPPVYNINKNDFRDVVQKLTGSPAHERISAPPQQPVHHPKAQQSSRLHRIRPPPLAHVINRPPGLLNNVPPPSWSGGFVVPRPTAPLSPLPPLPPVHAAAESPVSSYMRYLQNSMLAMDSNRREFSGLSPLAPLVSPRWYQQQQENAPPPLNSGRPPPPGTVSQAPPQSLGCLSSPKSPYGLLSPSLLLSPTSGQLGFPASPTTVPPLPSPK
>BrVQ9-2(Bra008356)
MDKSCNSSRDSSAVSATATSSTGNNNTGGNRDHHYLRQLNKLSHKISKPTVASSSSSVSAAVNQETSHQPLPPPPQQPPINHGNLHQHQPPVYNISKSDFRDVVQKLTGSPAHERISAPPPIHHPRPQQSSRLHRIRPPPLAHVINRPPGLLNDAHRNWSGGFVPRPTAPLSPLPPLPPVHAAAESPVSSYMRYLQNSMLSGPSPLAPLVSPRWYQQQQQENAPPPEINSRPPHPQSAPAQQSFGCLSSPKSPYGLLSPSLLLSPSSSQLRFPGSPTTVPLPSPKFKGH
>BrVQ10-1(Bra008359)
MSGRGKVKQEPMKVVFINTQYVETDARSFKNVVQELTGKDAIVAAGPYESPSAYAYDGGNKSGHDTRRLYGGGGRGGVETTTEFDRFFKEMPAMEEFYKLWSEN
>BrVQ10-2(Bra003642)
MSERGKVKPEPMKVVFINTQYVETDTRSFKTVVQELTGKDAIVAPGPFESPSTSDVRCYGGGSKIVEDSRRSNGGGGEVGTTTEFDRFFKEMPPMEELYKLWSDN
>BrVQ10-3(Bra035035)
MKVVFINTQYVETDARSFKNVVQELTGKDAIVAAGPFESPSTSDDRCYGGGNRVGEDSRRPYDGGGAETTTEFNRFFKEMPPMEELYKLWSES
>BrVQ11-1(Bra035182)
MSHPNHHQQPPSYVTDPNTMFVQADPSNFRNIVQKLTGAPPELSTAQQKLPLTPKKPAFKLHERRQSSKKMELKISNDSFSHFHRGFLVSPVSHLDPFWARVSPHSAREYPHPPADNEEQKAIAEKGFYFLPSPRSGVEPAPELLSLFPLSSPNGTNHRNEDDYRDC
>BrVQ11-2(Bra003566)
MSHQNHHQLPTYATDPNTMFVQADPSNFRNIVQKLTGASPPELSAVSAARRKLPLTPKKPAFKLHERRQTSKKMKLEINNITDDSLSHFNRGFLVSPVSHLDPFWTRVSPHSAREYPHPTPDNKEQKAIAEKGFYFLPSPRSGAEPAPELLPLFPLRSLNATNQRTEEDYRNS
>BrVQ11-3(Bra008473)
MSHKNHHSQRPSYATDPNTMFVQADPSNFRNIVQELTGAPPELSPVSTAQHKLPLTPKKQAFKLHERRQSSKRMELKINNDSLGQFNRGFLVSPVSHLDPFWTRVSPQSARENHHAMPEKEEQKVIAEKGFYFLPSPRSGDEPAPELLPLFPQRNENDHCHSSY
>BrVQ12 (Bra039937)
MEATSQPCFSHNYLRSSENYNSSLHSTRKQPAKPWKRPVTASLQRMHPRVYRVEPVNFKELVQRLTGAPQDHERDEVHQVETKPLLKVQHGLVEVRQPLKIFRETTTQENPLAFDLSPSSSRFWEAFPLLSSANLSRW
>BrVQ14-1(Bra023004)
MDRPRQNDHLGVNKIGKNIRKSPLTQPSVAAHANLAAEAARPQAQPQVYNINRSDFRSIVQQLTGSPSRESLPGPPQNNSPKPQNTRLQRIRPPPLMQINQPGAPLHHHHPHSLMGPPPPQWHMPQVTQQQQQQPMMGQGDQFWSNTTESPLSGYMRYLQSPLGDAGSSGNHMQPPGHEHGPYMPAHEQPPYMLAQPQPQSQHQPYMPGHENRPYMPAQAQFQPRQYMPGHEHGPYMPAQPQSQPQPYMPCHENGPYMPAQPHSQPQQYMPAQPQTQPDPYMMHGSQPQMNMQGPLQPSQYPPPPGLVPNLPPPQFNGPVPVTSTLPSPSFNQMYNGFHSLQNNGFGSLQSPTSQFGMPSPTYPNMLSPRSPNPLLSPGVQYPQPLTPNFSFSQLAQSG…
>BrVQ14-2(Bra017329)
MDRPRQTDHLGVNKTGKNIRKSPIHQPNFSANANATARPQAQPQVYSVSKNDFRSVVQQLTGSPSRESLPRPPPQNNNSPRPQNTRLQRVRPAPLTEINRPALPLPTMPLQQRPHSFVQPPFPQGTQQQQPVVGHGDQSWSNTAESPISGYMRYLQSSLGDPGPSGNHMQPGHEQRPYIPAQPQPPPQTQPQPLQPSQYQPPPGLVPSPVPRNLPFPQFNGPVPGTPTLPSPRFSQMYGGFPSPRYDGGFPSPWYNSFGPLPSPTGYPNMFSPRSPYPLLSPGVQYPQPLNPNFSFSQLAQPGSHGPGAGAGPSQPPPSPGLMFPPSPSGFFPIPSPRWGGY
>BrVQ14-3(Bra005358)
MDGPRQNDHLGVNKIGKNIRKSPLHQPNFGANANAARPQGQPQVYNISKTDFRSMVQQLTGSPARESLPRPPPQNSSPKPQSTRLQRIRPPPVTQINQPAAPVQHYPHGYASGPPPQPRLLQGTQQLQQQPMMGHGDQFWSNTAESPISGYMRYLQSSLGDAAPSGNQMQPGYEHRPYMPPAQEHRPYMPPAQEHRPYMPPAQEHRPYMPAQEHRPYMPAQPQPYMAPQAQTQPQAQPHMMPGSQPHMNMQGPLPPPGLVPSPAPRNLPSQPQFNGPVPGTPTLPSPRFNQMYGGFPSPRSNGFGPLNSPTSQFAPPSPSGYPNMFSPRSSYPLLSPGVQYPQPLTPNFSFSQLSQSGNQGPGAGTGPPQPPPSPGLIYPLSPGFFPSPRWGNY
>BrVQ15 (Bra016956)
MVTSEGLASVEPWLLYRQGFNVDSWLLHDTFSHDNDLLAKALHNTVSAPPPHTLPPSLFFDSYNPSSTHTLSSNVSGGSSQEVVGGGAKRKHNCFLTEGKATKRRRSRPSKKPQTTFITADPSNFRQMVQQVTGAKCINNDTSSSVLFTPIVKPEPHRLVNILTGAVPTLDTSAFLTNHHHENLLAGNTFSGSDAVGLPPEKANAKSGGSAVEFDPYPTFPTLESWKVM
>BrVQ16-1(Bra000216)
MESSSTLLKSSNQRKSPSSPTRKPPRQKRKTTTTTSNNKPIKVRYISNPMRVETCASKFRELVQELTGQNAADLPPGPTTFAAKDPHKKEINPEPLDEGICEYYSPMDDEVFNAPQMSAALSAFFSSGFYNVNALESIGSL
>BrVQ16-2(Bra004604)
MKSSSALLTSLNQIQPSSSPTRKPPKQKRKATTSNDNKPIKVRYISNPMRVETCPSKFRELVQELTGQDAAELPPEPTTYAAADPQQEEINPEPLEEGVSEYYSPLDEEVFSAPQMSAGLSAFFSSGFYNVNALGSIGSL
>BrVQ18-1(Bra004825)
MEVTQYHQSFNEGSSSRVSMNKNSQVISKIKPKIRIIHIFAPEVIKTDVKNFRSLVQSLTGKPTAGEVKTDKKRANSRVSTSQEPVCRDHQPVNRLTGFTGLLANGGNHQVKEEWGSGDHKRTSNTNTYFDLEGLIQDVGEDYFSSFPVRSSSSSQVEGFIFNNNHNTNNNFDTKGHNSS
>BrVQ18-2(Bra037658)
MEVTQYHQGNFNKGSSSRVSMNKNSQVISKIKPKIRIIHIFAPEVIKPDVKNFRSLVQSLTGKPAAVEVKTGKRSARPRIPTSQEPVCGDHQPVNRRTSFTGLLANGGNHEVKEEWGSGDQNTRNTNTYFDLEGLIQDVGEDYFSSFPMRSSPSSSQVEGFTFSNNNTSNCFDTKGHNIS
>BrVQ19-1(Bra027262)
METTTKPNQSSTTSSSASSSIINGSLHHHIITRSDHYPTTFVQADTSTFKQVVQMLTGTSSPRSPDSPRPPPSPSGKSTFVIPPVKTTQPKKHSGNKLYERRSNNSSLKNSLMINTLMVGGGNGAGSPRFSPRNQEILSPSCLDFPKLALNSPVTPLKHGGDGNDGDPFDRMSPLSEEERAISEKGYYLHRSPISTPRESEPQLLPLFPVTSPRVSAASPDTSTS
>BrVQ19-2(Bra021096)
MEIATKQGDSRNPSSTSCSSASSSLHQHIITRSDHYPTTFVQADTSSFKQVVQMLTGSSSPRSPDSPRPPTTPPGKGNFVIPPIKTTQPKKHSGNKLYERRSNNNSLKNSLMINTLMIGGGNGAGSPRFSPRNQEILSPSCLDFPKLALNSPVTPLKHGGDGNDSDTFDRMSPLSEEERAISEKGYYLHRSPRESEPQLLPLFPVTSPRVSSSPEN
>BrVQ20 (Bra037588)
MNSTFNDHHHLKREPNDNSGVGIIYPPSPSPLLKLNKDSHVIKKPPSPSSSSSTAAKPRQPVIIYTNTPKVIHTNPKDFMALVQKLTGMSHSEEDSGGSSSAVTDRGGKSINRSVSDLTVDRKVNRTRCGGGGGGGGGGGGGHNSYNRTYSGPGGANGKGIFFSNTTICEDSESSSVITTDENMGGGGEHGHVNSSLPYSAVAVSPFPHPPPPPPPPPQSMYDGTNGINYSSYFSTLLPVNPADNFLCGNQNFANFDDPLYFMPNMRSSFSSSSSSGFDGLTEFRDF
>BrVQ21-1(Bra037569)
MDPSESFAGGNPSDQQNQKRQLQICGPRPAPLSVNKDSHKIKKPPKHPAPPPQHRDQAPLYAAREPVVIYAVSPKVVHTTASDFMNVVQRLTGISSAVFLESGNGGDVSPAARLALTENASPRGGKEPVMAAKDETVEIATAMEEAAEFSGCAPGILSPSPAMLPAASAGIFSQMTTHQGGMFSPGLFSPAGLMSPFGFASLVASPTFADLFSHIWD
>BrVQ21-2(Bra022345)
MDPSDYLTGNNPSDQQNQKRQLQIYGPRPSPLSVHKDSHKIKKPPKHPVPPPQHHHRDQAPLYAPREPVVIYAVSPKVVHTTTSDFMNVVQRLTGISAGVFHESGNGGDVSPAARLAATENASPRGGKEPTAAAAKEETVEIATAMEEAAEFSGYAPGILSPSPAMLPTASAGIFSPGWFSPSGLMSPFILYSPSYASLVASPTFADVFSSHIWDL
>BrVQ21-3(Bra001716)
MDPWEHFAGGNPSDQQTPKRQLQICGPRPSPLSVNKDSHKIKKPPRHPAPPPQHHRDQAQPYAPREPVVIYAVSPKVVHTTTSDFMNVVQRLTGISSEVFLESRNDGDVSPAARLAATENASPRGGKEPVEISTAMEEAAELSGYAPGILSPSPAMLPTVPAGIFSPMFHLGGLFSPALPPGLFSPAGLMSPGYASLAASPTFADFFSHIWDRE
>BrVQ22-1(Bra023849)
MANNPNDWSPFYNNNQTFFTTSTITSTAVTTTTTASPSGEATSMDSRLSPETGRVTKPARKRSRASRRTPTTLLNTDTSNFRAMVQQYTGGPSAMAFGSGNTTSGFSLTASSDPSAGSSQQVPWQYSYQPHAGPPPQRPYMFSLSNVNPVVGYSNMNNPNYTAVPGVFGTADGGAGGSAPSSNEATNSNTSSSRLQ
>BrVQ22-2(Bra041035)
MANSNDWSHLYSNNQAFYTTSTITSTAVTTTTAASPSGEATSMDSRLSPETGRVTKPARRRSRASRRTPTTLLNTDTSNFRAMVQQFTGGPSAMSFGSGNTTSGFSLTSSSDPSAGSSQQVPWQYSYQPHAPPPPQQPYMFSLNNMNPVVGYSNMNNPNTMVPGGFGTAGGGGGGSAPSYKEATNSNTSSSRLQ
>BrVQ23-1(Bra007265)
MDSSTFLAATSLDQGKPFPVSRQLSKQKKKTASANKAIKVRYISNPMKVKTCASKFRELVQELTGQDAVDQPEPVFSPSTVSDLSPSPPPPENLAPRVLEQEPFDDRVCEYFEPLDGEEMFLPQMSAGFSGFFSNGFYNVNDFGRIDSV
>BrVQ23-2(Bra014675)
MKSSSSWTFLTTTSLDQRNPSRVSKKTPKQMKKTASRNKPIKVRYISNPMRVKTCASKFRELVQELTGQDAVDLELEPEFSPSAVSDDSSSPRPPENLAPRDLHQEPFDDRVTGYYEPLNGEEMFVSQLSGGFSGYFSNEFYNGDVDGFGKIDLCDDILSI
>BrVQ23-3(Bra014674)
MKSSSSSSWTFLTTTSLDQRNPSPVVTSKQMKKTASRNKPIKVRYISNPMRVKTCASKFRELVQELTGQDAVDLELEPEFSPSAVSDHSPSPPPPETFAPHIPHQEPFDDLVAGYYEPLDGEEMFLSQMSRGFSGYFSNEFYNVNDYLGRIDSL
>BrVQ24-1(Bra007279)
MASSDGLASVDPWSFRQSFNIDSWLLPDPFSHDSDVLAKALHKSISDPLSPSAYFDSAAVSDLSPPQTVSNVSFGSDPEIAGGGGGGAKRKRGPGVAGGKPAKRRSRVSTKKSQTTFITADAANFRQMVQQVTGAKYNGSPHGFFAPVVKPEPHRLASRLPPSGAFDGSSEVPTLDTSSFLSNHHQETLVTELGSVSAPGSSTGVGGGSAVELDSYPSFPTLESWKVM
>BrVQ24-2(Bra014665)
MASSDGLASVEPWSFRQSFNIDSWLLPDHDSDILAKALHRSISTSTPTDPFSPSASFDSAAVSDLSPPQTLSNVSFASDPDISGAGGAKRKRGPGVAGDKPAKRRSRVSTKKSQTTFITADAANFRQMVQQVTGAKFIGSSSHGIFPPIVKPEPHRLASRLPPPSSSAVPTLDTSSFLSNHHQENMVNDFSSVSAPASSFFQSSTVKAGVSGGGGSAVELDSYFPTLESWKVM
>BrVQ25-1(Bra007373)
MEATIFKGRRTSSSALAMHKQSYSITKSKPKIRIIHIYAPEIIKTDVANFRELVQSLTGKPEDHGVSKTKPRRDTHRLHHRQVLDMTNAEKLSESEHYDQGFCLNSEMEEISMTWNGNNGVGESSGGFLNGMGDFEGFIQELGEFPYLPLTSMDVSASSNSSSSSHLHGGSVFSDSHNQFV
>BrVQ25-2(Bra014594)
MEATIFKKTRSSSSTLAMHKQSYSITKTKPKIRIIHIYAPEIIKTDVANFRELVQSLTGKPEDHGVSKTKPRRGTRGQVQDMINKEKLREAERCDDQGFCSNSEMEEMSMTWHGGNNCGESSGGFLNGFGDFGGFIQELGEFPYLPLSSMDASASSNSSSSSHLHGGSIFSDSHHQF
>BrVQ26-1(Bra007505)
MERSSMKAKHDLDHLPHQSFYGDYSKTLVPKNKNSQIITKIKPKIRIIHIFAPEIINTDVKNFRTLVQSLTGKTEITKTSPKKKTNIPAPQPPPQESGQEHTAELVNSIIGSHVVKEEWRSGSNTNTYFDLDGLIDLDEDDNIFSSRWFDLQVQ
>BrVQ26-2(Bra014514)
MKAEYDLDHLPHQSFYGDYSKTLVPLNKNSQIVTKIKPRIRIIHIFAPEIINTDVKNFRTLVQSLTGKPDITKTGSRKKTRRTNIHAPPPPPQESGKEHTAEHVNMIIGSHVVKEEWGSGSNTNTYFDLDGLIDLDEDNIFSSRWF
>BrVQ26-3(Bra003400)
MVRNSMKAEYDLDHLPHQSFYGDNSRTLVPMNKNSQIITKIKRKIRIIHIFAPEIINTDVKNFRTLVQSLTGKPEITKTGSKKKITRTNIPAPPPPLQESRSEHTAEPVNSFIGSHVVKEEWGSCSNTNTYFDLDGLIDLDEENNMFSKNEDYYEWGVEVDGAISSRYSTGQAKNKYESPKFMIPENGHCDMDYEEKIKLSNLMDLQRTEYHKKHLQSIQQAIHYGVRYGLFYVDYNNGLKHFPKMSAMWFKEFLKREEEIEESEKEEYLLKSAIKKKRFL
>BrVQ27 (Bra039565)
MANPNNDWSQFYNKQTFFPTTSTTTTTASTSADSSVNPESRRVSKPTRRRSRASRRTPTTLLNTDTANFRAMVQQFTGGPSAMAFGSPSSGFSLTSSGPTAGASSVGYQYANFQNQVAHHEVLQQQRQYMVSSSNHVSTHLSYPNTVVSDGFLAVDESRDGGRGGGGYAPSSEMNSNSTTSWLQ
>BrVQ28 (Bra013438)
MNNNSSRAGQWLQHYEPHQVQELSPCFNGINMMPSSLGDGGGIVEAHETSGRRSRASRRAVPTTLLNANPSNFRALVQKFTGRSSGGESNRRRGPVTLDFGSPTTISKEAIFPVSGDRKSYGHDHVLNQHVNNERHVTWSGTEATTTYQLGEESNSVFDQQDHDLLREYSVNSSYDDGLDHVDYYYHDFHQATETLEEFMMSDLDL
>BrVQ29-1(Bra010608)
MSQSYLNSQETATQATKDYLASLHSSRKQPSKPLKRPISSPLNPMHPHVYRVEPVNFKELVQRLTGAPEHEPVANPFKSLDDAAKDSSPSFAFDLSSSSWGDLSLRNPANISRW
>BrVQ29-2(Bra017849)
MSQSYLSAQETNTLTTRNYLMSLHSTRKQPSKPMKRPVSSPLKSMHPQVYRVEPANFKELVQRLTGAPEHDDVVKPFKSFDDLANESSSSLAFDLSSSSWGDLSLQTPANLSRW
>BrVQ30-1(Bra010666)
MESGNSSSMQSSSGGGRGGEEEYDSRAVDQSISAFDHHNHHVPSLPPQQQSHLNLLHFDHNSDNNSLILPNYFNNNTFLPINQQPDPTSQPDLRTFSATSSFPPPNNIGVTKKPKKRSRASRRAPTTVLMTETSNFRAMVQEFTGIPSPPLFNNSVVNTTRLNTFLGLSSSSSPNSYNNNLLLRPFAQQLLPTTSPLLSGSQIHQQYQNPNNGFENINLQSLLQAQISNITSNPRSNNNDQFGQAMLQSASTTPMTTTAVANGNITTGENGGYGGSDHDHNNDSTWLCSSSDQRT
>BrVQ30-2(Bra011838)
MESGNSSSMQSSSGGGGGGEEYDSRAGDQSISAFFDHHNHHVVSLPRPQQNHINPLHFDHNNSLLQQNYFNSNSNGTFLPVNQQSDPVTQPELRTFTTTSSVPPNNVGVTKKTKKRSRASRRAPTTVLKTDTSNFRAMVQEFTGIPSPPLFNNNSVVNTTRLKTFLGLSSSSPNSYYNSSNNNILLQPFAQKLLPTSPLLSGSQIQQYQNPNNSFEDMNLQSLLQTQISNPRSNIQFGLGMLQSQSITPQTTTTVANGNKTTGENGGYGVSDHDHNNDNTWLCSSSDQRT
>BrVQ31 (Bra005995)
MNNQGSQNVATCKPVTTFVHTDTDTFREVVQRLTGPSESNAAAIPEATVIKTAIQRKPTSKLHERRQCMRPKLEIVKPPLSFKPTGKKPLSKSGITNLLTDPLSTSSSLVSNLSLIEGDKADPDSCTTNNEEEERAIKERRFYLHPSPRSKPGYTEPALLTLFPLTSPNSSGRP
>BrVQ32-1(Bra022063)
MDDQRNSDNHHQHHHLGVNKIGKNIRKDSSNQQNQQQNPQALFFNINKTDFRSIVQQLTVLGSASSVNPPQSTNPPKPPNSRLVKVRPAPLTQVNHHPPPPPVQSDPIAAETVQRNNQLSVNPAESPISAYMRYLIESSPVGNRPQLQNQNPVQPSPGLFPSHQPGPSPMLFQSPASQFVLSPPPRSPFPILSPNFFAFSPRFIAGGNEPLPPPSPGFFFPLLSPLWKNQ
>BrVQ32-2(Bra024996)
MDDHNNDNHHHHHLGVNKMGKNIRKEPSNQQNQQQNPQALVYNINKTDFRSIVQQLTGLGSASSVNPPQSTNSNPPKPPNSRLVKVRPAPLTQVTRPPPPHPVQSNPMASEPVQPINQLSINPAESPISAYMRYLIESSPVGNQPQPHNQNPVQPSTGLFPSQQTGPNPMLFQSPVSQFVLSPTPRSPFPLLSPNFAFSPRFLGGNESLPPPSPGFFFPLLSPLWKNQ
>BrVQ33-1(Bra003032)
MQNPPPIISSPRFLQPQTRSLPHHEQHQHLSNPYPTTFVQADTSTFKQVVQMLTGSSSTDTNTGKHHEAPSPVNNNKGGFSIPPIKKTNSFKLYERRQNNNNNMFAKNDLMINTLRLQNSQRLMFSSGNNVHQSPRFSPRNSSSENVLLSPSMLDFPKLGLNSPVTPLRSNNDPFNKSSPLSLGSSSEEDKAIAEKGYFLHPSPVSTPRDSQPLLLPLFPVTSPRNP
>BrVQ33-2(Bra022675)
MEVSSTSSICSKPEQIMQNYPPIITSPRFQPQTRSPSHHHHDQHQHLSNPYPTTFVQADTSTFKQVVQMLTGSSTDTKTENHHKAPSPVNNNKVGFSIPPIKKTNSFKLYERRQNNNNMFGKNNLMINTLRLQNSQRLMFSSGHNGQSPRFSPRNSSSENVLLSPSMLDFPKLGLNSPVTPLRSNDDPFNKSSPLSLGSSSEEDKAIAEKGFYLHPSPVSTPRDSQPLLLPLFPVTSPRNP
>BrVQ34-1(Bra024362)
MDSGNSSSMQSSSGGGGDQEEYDSRADQSLSALFNNNAATGSSNIAGQTQLDSLMANYFNTGWSTDNPLWSTTTSNPTDGSRPQPPPVPSEPVFFTNTVQENLRVVSNTNTNTNTDTNTSSPIGSVPTDKKTGLATTRNPKKRSRVSRRAPTTVLTTDTSNFRAMVQEFTGNPSTPFTGSSSSPFSRSRFDLFGPSSSSSSSFSRPLKPFPHKLIPPSSTSHHYSTPPTDYHQSLLRSMNMQNIANPFLNNQSPNNVPLMEDQSLSLRTSTGFGYVRANSEGLHNIIASSSSSMTQPTLNIIRGSNKNYEADNNLVRSISGEEQPMVQRSDGYAPLVASGAENNITDVRNEGTVELSWISSSD
>BrVQ34-2(Bra037806)
MDSGNSSSMQSSSGGGGDQEEYDSRADQSISALFNNSTTVSANIAGQTQLDSLIANYFNTGWSTDSPLLSTTTMKPTDGSRPPPPPILFTNPLQQDLRVASDTNTSSPICSVPTDKKNGLATTRNLKKRSRVSRRAPTTVLTTDTSNFRAMVQEFTGNPSNPFSGLSSSPFPRSRFDLFGPSSSSSQPLKPFPHKLIPPSSTSHPYLNPPSTNYHQSLLLNMNTQNIANPLRDQSLSLRTSNGVGHVDVGTNFEGLQNIMASSSSMTQPTLNTMHGLDMVPVERSDVYTTPVASGTENNNFGVVRNEGTVDLSWISTSD
>BrVQ34-3(Bra031876)
MDSGNSSSMQSSSGGGGGEQEEYDSRADQSISALFNNNNATTAGQTQLDSLIANYLNTGWSTDNPLWSTTTMKPTDGSTPPVFFTNPLQQDLRIVSNTDTSSPISSVPTDKKNGLAVTTRIPKKRSRVSRRAPTTILTTDTSNFRAMVQEFTGSPSNPFAGLSSSSSPFPRSRSDLFGPSSPSSSSRPLKPFPHKITPPPSTSHRYLTPPSTYYHQGHLLNLNMQTIANPFFNNHVDVGTNFGGLHNIIASSSSSMAQPTLNTMHGLDKNSDTDNDPLRSINGEEQYMVQRSDGYTPPVASGSENNLAAVRNKGMKELSWISPSD
>BrVQ35 (Bra006328)
MKEGGFLSLSYSFCLGNIIGTLREGGRGGGEAGAHGGAGGQRGGAGGAWGTARRRGRGEGHNAMLSLSVLSLPSKRQRTAYPLPSTSPTTHNNGSVCVDKLPEGINEMKIKDDKEMEAAVVDGNGTETGHIIVTTIGCKDGQPKQTISYMAERVVEQGSFGIVFQAKCLETGETVAIKKVLQDKRYKNRELQTMRLLDHPNVVSLKHCFFSTTEKDELYLNLVLEYVPETVYRVSKHYSRANQRMPTIYVKLYTYQICRALAYIHGGVGVCHRDIKPQNLLVNPHTHQVKLCDFGSAKVLVKGEPNISSICSRYYRAPELIFGATEYTTAIDIWSAGCVLAELLLGQPLFPGESGVDQLVEIIKVLGTPTREEIKCMNPNYTEFKFPQIKARPWHKIFH…

## Sheet: Table S3
Table S3
The similarity between Arabidopsis thaliana and Brassica rapa by using BlastP on NCBI
Arabidopsis thaliana		Orthologous VQ proteins in Brassica rapa		Protein BLAST result between Arabidopsis thaliana and Brassica rapa			Protein BLAST result of Brassica rapa VQ genes
Gene Name	Gene locus	Gene Name	Gene locus	Query cover	E-value	identity	Gene Name	Query cover	E-value	identity
AtVQ1	AT1G17147	BrVQ1-1	Bra025998	0.94	9e-52	0.85	BrVQ1-2	1	7e-61	0.84
		BrVQ1-2	Bra016616	0.94	3e-58	0.83	BrVQ1-1	1	1e-51	0.84
AtVQ3	AT1G21326	BrVQ3-1	Bra025892	1	2e-89	0.67	BrVQ3-2	0.88	2e-62	0.62
		BrVQ3-2	Bra012276	0.89	2e-66	0.63	BrVQ3-1	0.96	1e-57	0.62
AtVQ4	AT1G28280	BrVQ4	Bra030082	0.94	2e-130	0.89
AtVQ5	AT1G32585	BrVQ5	Bra035492	0.92	6e-55	0.47
AtVQ8	AT1G68450	BrVQ8	Bra033934	0.88	9e-59	0.65	BrVQ20	0.04	0.008	0.64
AtVQ9	AT1G78310	BrVQ9-1	Bra035028	0.98	7e-118	0.71	BrVQ9-2	1	7e-108	0.75
		BrVQ9-2	Bra008356	1	6e-114	0.72	BrVQ9-1	0.98	2e-111	0.75
AtVQ10	AT1G78410	BrVQ10-1	Bra008359	0.99	1e-54	0.79	BrVQ10-2	1	1e-46	0.74
							BrVQ10-3	0.89	2e-50	0.77
		BrVQ10-2	Bra003642	0.99	2e-51	0.79	BrVQ10-1	1	7e-50	0.74
							BrVQ10-3	0.89	1e-54	0.82
		BrVQ10-3	Bra035035	0.88	2e-51	0.75	BrVQ10-1	1	1e-47	0.76
							BrVQ10-2	1	5e-49	0.81
AtVQ11	AT1G80450	BrVQ11-1	Bra035182	0.98	1e-96	0.79	BrVQ11-2	1	5e-97	0.8
							BrVQ11-3	0.98	2e-87	0.77
		BrVQ11-2	Bra003566	1	2e-94	0.77	BrVQ11-1	1	5e-97	0.8
							BrVQ11-3	0.92	1e-88	0.8
		BrVQ11-3	Bra008473	0.93	9e-87	0.75	BrVQ11-1	0.96	2e-87	0.77
							BrVQ11-2	0.95	1e-88	0.8
AtVQ12	AT2G22880	BrVQ12	Bra039937	1	1e-59	0.69
AtVQ14	AT2G35230	BrVQ14-1	Bra023004	1	8e-131	0.61	BrVQ14-2	0.72	9e-73	0.66
							BrVQ14-3	1	2e-137	0.65
		BrVQ14-2	Bra017329	1	2e-127	0.59	BrVQ14-1	0.54	5e-62	0.66
							BrVQ14-3	1	2e-120	0.6
		BrVQ14-3	Bra005358	1	2e-139	0.68	BrVQ14-1	1	3e-131	0.65
							BrVQ14-2	0.34	5e-49	0.73
AtVQ15	AT2G41010	BrVQ15	Bra016956	1	1e-110	0.72
AtVQ16	AT2G41180	BrVQ16-1	Bra000216	0.98	2e-69	0.74	BrVQ16-2	1	2e-80	0.78
		BrVQ16-2	Bra004604	0.98	2e-72	0.76	BrVQ16-1	1	3e-78	0.78
AtVQ18	AT2G44340	BrVQ18-1	Bra004825	1	5e-100	0.83	BrVQ18-2	1	8e-107	0.84
		BrVQ18-2	Bra037658	1	3e-103	0.77	BrVQ18-1	1	4e-94	0.81
AtVQ19	AT3G15300	BrVQ19-1	Bra027262	0.99	3e-115	0.84	BrVQ19-2	0.85	1e-118	0.9
		BrVQ19-2	Bra021096	0.88	3e-108	0.87	BrVQ19-1	0.87	2e-118	0.9
AtVQ20	AT3G18360	BrVQ20	Bra037588	1	2e-98	0.68	BrVQ8	0.11	0.008	0.54
AtVQ21	AT3G18690	BrVQ21-1	Bra037569	0.99	1e-117	0.84	BrVQ21-2	1	8e-109	0.81
							BrVQ21-3	1	2e-107	0.8
		BrVQ21-2	Bra022345	0.99	5e-105	0.76	BrVQ21-1	0.99	6e-112	0.8
							BrVQ21-3	0.99	1e-99	0.76
		BrVQ21-3	Bra001716	1	7e-114	0.78	BrVQ21-1	0.99	6e-110	0.81
							BrVQ21-2	0.99	2e-96	0.77
AtVQ22	AT3G22160	BrVQ22-1	Bra023849	0.98	7e-92	0.84	BrVQ22-2	0.98	1e-75	0.89
		BrVQ22-2	Bra041035	1	3e-68	0.79	BrVQ22-1	0.98	3e-98	0.89
AtVQ23	AT3G56710	BrVQ23-1	Bra007265	0.97	2e-74	0.74	BrVQ23-2	0.97	1e-72	0.73
							BrVQ23-3	0.92	5e-64	0.76
		BrVQ23-2	Bra014675	0.97	8e-71	0.71	BrVQ23-1	0.91	2e-68	0.73
							BrVQ23-3	0.86	1e-74	0.82
		BrVQ23-3	Bra014674	0.91	4e-58	0.66	BrVQ23-1	0.95	1e-68	0.75
							BrVQ23-2	0.96	2e-88	0.83
AtVQ24	AT3G56880	BrVQ24-1	Bra007279	1	2e-111	0.73	BrVQ24-2	1	5e-118	0.77
		BrVQ24-2	Bra014665	1	5e-110	0.72	BrVQ24-1	1	7e-108	0.74
AtVQ25	AT3G58000	BrVQ25-1	Bra007373	0.98	4e-100	0.82	BrVQ25-2	0.99	5e-90	0.82
		BrVQ25-2	Bra014594	0.98	2e-79	0.78	BrVQ25-1	1	2e-100	0.82
AtVQ26	AT3G60090	BrVQ26-1	Bra007505	1	8e-96	0.85	BrVQ26-2	0.93	1e-90	0.86
							BrVQ26-3	0.94	4e-73	0.83
		BrVQ26-2	Bra014514	0.93	2e-92	0.85	BrVQ26-1	1	1e-90	0.86
							BrVQ26-3	0.98	6e-76	0.84
		BrVQ26-3	Bra003400	0.94	6e-79	0.85	BrVQ26-1	0.6	2e-84	0.83
							BrVQ26-2	0.54	9e-87	0.84
AtVQ27	AT4G15120	BrVQ27	Bra039565	0.94	1e-71	0.73
AtVQ28	AT4G20000	BrVQ28	Bra013438	0.99	3e-99	0.72
AtVQ29	AT4G37710	BrVQ29-1	Bra010608	0.93	3e-65	0.82	BrVQ29-2	1	2e-64	0.75
		BrVQ29-2	Bra017849	0.93	4e-58	0.73	BrVQ29-1	1	2e-64	0.75
AtVQ30	AT4G39720	BrVQ30-1	Bra010666	0.93	2e-143	0.78	BrVQ30-2	0.93	5e-134	0.77
		BrVQ30-2	Bra011838	0.93	1e-138	0.74	BrVQ30-1	0.93	5e-134	0.77
AtVQ31	AT5G08480	BrVQ31	Bra005995	1	1e-95	0.84	BrVQ35	0.77	1e-62	0.73
AtVQ32	AT5G46780	BrVQ32-1	Bra022063	1	8e-98	0.81	BrVQ32-2	0.93	4e-101	0.85
		BrVQ32-2	Bra024996	0.91	1e-104	0.85	BrVQ32-1	1	2e-104	0.84
AtVQ33	AT5G53830	BrVQ33-1	Bra003032	0.92	1e-125	0.88	BrVQ33-2	1	9e-118	0.89
		BrVQ33-2	Bra022675	0.98	1e-118	0.86	BrVQ33-1	0.93	3e-128	0.9
AtVQ34	AT5G65170	BrVQ34-1	Bra024362	0.94	3e-139	0.69	BrVQ34-2	1	4e-144	0.69
							BrVQ34-3	0.95	8e-134	0.67
		BrVQ34-2	Bra037806	0.94	4e-148	0.69	BrVQ34-1	0.94	9e-123	0.66
							BrVQ34-3	0.94	3e-129	0.69
		BrVQ34-3	Bra031876	0.94	5e-133	0.67	BrVQ34-1	0.94	4e-131	0.65
							BrVQ34-2	0.94	5e-144	0.7
		BrVQ35	Bra006328				BrVQ31	0.18	2e-62	0.73

## Sheet: Table S4
Table S4. Arabidopsis VQ genes expression patterns in different tissues
Gene Name	Gene locus	roots	stem	adult leaf	juvenile leaf	flower
AtVQ1	AT1G17147			9.73	8.02	7.25
AtVQ2	AT1G21320	7.74	7.87	8.33	8.09	7.78
AtVQ3	AT1G21326			8.23	8.7	7.6
AtVQ4	AT1G28280	11.96	12.23	11.83	11.6	11.47
AtVQ5	AT1G32585			7.61	7.63	7.43
AtVQ6	AT1G32610	8.79	9.43	9.27	9.68	9.23
AtVQ7	AT1G35830			8.48	8.86	8.55
AtVQ8	AT1G68450	11.83	8.87	9.32	8.83	8.55
AtVQ9	AT1G78310	11.26	10.93	10.59	10.12	10.18
AtVQ10	AT1G78410	8.1	8.91	10.17	8.81	7.38
AtVQ11	AT1G80450	8.99	7.78	9.34	9	8.59
AtVQ12	AT2G22880	10.48	8.45	11.41	9.07	7.8
AtVQ13	AT2G33780			8.93	9.26	8.83
AtVQ14	AT2G35230	10.39	10.93	10.55	10.63	10.39
AtVQ15	AT2G41010	10.81	10.83	10.82	9.75	10.36
AtVQ16	AT2G41180	8.8	10.45	11.85	11.92	9.21
AtVQ17	AT2G42140	8.52	7.96	7.77	7.62	8.37
AtVQ18	AT2G44340			7.32	7.33	6.91
AtVQ19	AT3G15300	11.73	8.88	8.96	8.7	9.03
AtVQ20	AT3G18360	8.38	9.01	8.95	9.08	10.12
AtVQ21	AT3G18690	11.37	10.55	11.69	10.83	10.39
AtVQ22	AT3G22160	11.28	10.43	11.81	10.75	9.4
AtVQ23	AT3G56710	9.16	11.51	12.57	11.84	9.24
AtVQ24	AT3G56880	13.17	12.3	13.73	13.08	13.28
AtVQ25	AT3G58000	7.81	7.83	8.05	8.67	9.27
AtVQ26	AT3G60090			7.17	6.97	6.91
AtVQ27	AT4G15120	10.5	8.23	9.22	8.8	8.67
AtVQ28	AT4G20000	10.54	8.86	9.36	8.52	7.75
AtVQ29	AT4G37710	8.31	7.62	8.23	7.74	7.32
AtVQ30	AT4G39720	10.5	10	9.03	8.97	9.07
AtVQ31	AT5G08480	7.73	8.01	7.96	8.07	9.08
AtVQ32	AT5G46780	12.49	13.05	12.17	11.24	9.46
AtVQ33	AT5G53830	10.11	11.66	9.91	9.75	9.85
AtVQ34	AT5G65170	8.54	10.53	8.47	8.49	8.27
Note: The above data were extracted from Genevestigator (https://www.genevestigator.com/gv) with mean values expressed in different tissues.

## Sheet: Table S5
Table S5. Arabidopsis VQ genes expression patterns to different stresses and hormones
Gene Name	Gene locus	ABA		cold		drough	GA3		heat	osmotic		SA	salt
		1h	3h	early	late		1h	3h	early	early	late		early	late
AtVQ1	AT1G17147
AtVQ2	AT1G21320	-1.07	-1.09	-1.03	1.06	-1.15	-1.01	1.04	1.03	1.06	-1.04	1.28	-1.02	-1.02
AtVQ3	AT1G21326
AtVQ4	AT1G28280	-1.14	-1.18	1.02	-1.07	-1.28	1.06	1.03	-1.38	1.13	1.15	1.32	-1.09	-1.1
AtVQ5	AT1G32585
AtVQ6	AT1G32610	1.02	1.03	1.04	-1.03	-1.3	-1.01	-1.08	-1.24	-1.1	-1.49	1.01	-1.03	-1.27
AtVQ7	AT1G35830
AtVQ8	AT1G68450	-1.05	1.34	1.04	-1.11	1.95	-1.05	-1.04	1.09	1.05	-1.04	1.33	1.19	-1.07
AtVQ9	AT1G78310	-1.26	1.03	1.04	2.48	-1.14	-1.06	-1.08	1.65	1.24	1.78	-1.04	-1.03	1.27
AtVQ10	AT1G78410	1.12	-1.08	1.27	1.51	-1.54	-1.02	-1.01	-1.06	3.79	4.88	2.72	1.01	1.13
AtVQ11	AT1G80450	1.08	1.22	1.41	2.8	-1.09	1.03	1.06	-1.07	1.09	-1.04	-1.02	-1.02	-1.19
AtVQ12	AT2G22880	1.01	-1.12	1.18	1.05	1	1.11	1.02	1.07	3.84	1.4	1.38	1.23	-1.05
AtVQ13	AT2G33780
AtVQ14	AT2G35230	-1.11	-1.33	1.06	-1.17	-1.64	1.04	-1.14	1.31	-1.14	-1.21	1.2	-1.15	-1.18
AtVQ15	AT2G41010	1.07	-1.1	2.81	3.24	-1.05	1.04	1.1	1.05	1.38	1.27	1.74	-1.09	1.69
AtVQ16	AT2G41180	-1.09	-1.34	-1.14	1.28	-1.11	-1.03	-1.05	-1.88	2.19	2.31	2.29	1.32	1.59
AtVQ17	AT2G42140	-1.03	-1.04	1.06	1.04	1.08	1.06	-1.01	1.06	1.03	1.06	-1.14	1.05	1.03
AtVQ18	AT2G44340
AtVQ19	AT3G15300	1.48	-1.1	-1.02	1.34	3.7	-1.02	-1.05	-1.21	1.22	1.37	1.16	1.36	1.61
AtVQ20	AT3G18360	-1.04	-1.13	-1.04	1.15	-1.29	-1.01	-1.15	1.13	1.05	-1.17	1.43	1.09	-1.01
AtVQ21	AT3G18690	-1.06	-1.02	1.06	-1.24	-1.75	1.05	-1.01	1.07	1.5	1.21	2	1.1	-1.14
AtVQ22	AT3G22160	-1.23	-1.13	-1.07	1.16	1.27	1.14	-1.07	-1.09	1.47	1.2	1.76	-1.02	-1.04
AtVQ23	AT3G56710	1.08	-1.03	2.19	1.15	-1.72	1.18	1.3	-1.64	3.14	3.01	9.58	-1.48	1.44
AtVQ24	AT3G56880	2.01	4.63	3.83	4.88	-1.16	1.04	1.26	-1.02	2.05	3.56	1.58	1.46	3.22
AtVQ25	AT3G58000	-1.04	1.04	1.03	-1.27	-1.08	1.02	1.13	1.18	-1.15	-1.07	-1.15	-1.09	-1.01
AtVQ26	AT3G60090
AtVQ27	AT4G15120	2.17	4.12	-1.01	1.06	1.47	-1.1	-1.11	1.37	1.34	1.08	1.68	1.1	-1.18
AtVQ28	AT4G20000	-1.21	-1.1	1.08	1.08	-1.18	-1.09	1.13	1.11	1.71	2.59	1.42	1.15	1.01
AtVQ29	AT4G37710	-1.04	-1.01	-1.02	1.04	-1.04	-1.11	1.01	1.1	1.1	-1.01	1.04	1.15	-1.07
AtVQ30	AT4G39720	1.08	1.76	1.15	-1	1.23	-1.06	1.01	1.22	1.04	-1.05	1.22	1.12	-1.03
AtVQ31	AT5G08480	1.03	1.11	1.03	-1.21	-1.4	1.04	1.09	1.1	-1.1	-1.41	-1.1	-1.01	-1.33
AtVQ32	AT5G46780	-2.17	-1.92	1.22	-4.27	-1.78	-1.09	-1.14	-1.11	1.25	-1.55	1.26	-1.19	-1.78
AtVQ33	AT5G53830	1.2	1.71	1.32	-1.3	1.07	1.07	1.01	1.88	1.3	2.11	-1.04	1.34	1.56
AtVQ34	AT5G65170	-1.06	1.13	-1.01	-1.16	-1.06	1.08	-1.14	1	-1.09	-1.23	1.16	-1.01	-1.21
Note: The above data were extracted from Genevestigator (https://www.genevestigator.com/gv) with values expressed as treatment/mock in a linear scale. Positive values indicate induction and negative repression.

## Sheet: Table S6
Table S6 The information of primers used in the Quantitative Real-time PCR
Gene	Sequence of Primers (5'-3')
BrVQ1-1	F: TACGGCAGCAAAGACTCGTCA
	R: GGAGGCATCTCCCTGAAAAAG
BrVQ1-2	F: TCATCACATCAGTATTTTGGCG
	R: GAGGCATCTCCCTAAAAAATCT
BrVQ3-1	F: AGGGTTTGTGGGTGGCATAG
	R: CGTTGGAGTGGCTTGTAGGA
BrVQ3-2	F: ACTTCGCTGCCGTTGACA
	R: GATGGAATCTTTGGAGGACT
BrVQ4	F: GCCCCGTCACTCCTCTTATAC
	R: GAACTAGAATCTGTGGAAGAACCTG
BrVQ5	F: AATGGTTCGCCTCAACAAATAG
	R: CCAGGTTGAGTCACAGACGAAA
BrVQ8	F: GTCTGTGTTAACCACGGAAGAGG
	R: CTCGGCGTATACAATGGAATATC
BrVQ9-1	F: CGGAGGGAGTTCTCTGGCTT
	R: CGGAAACCCTAACTGACCTGAC
BrVQ9-2	F: ACAACAGCAACAGGAAAACGC
	R: TGACGATGGCGATAACAGTAAG
BrVQ10-1	F: TTACGAGTCTCCCTCCGCTT
	R: GGCAGGCATCTCCTTGAAA
BrVQ10-2	F: GAGTCTCCATCCACTTCCGAC
	R: GAGGCATCTCCTTGAAAAATCTAT
BrVQ10-3	F: ACTTCCGACGACCGTTGTTA
	R: GAGGCATCTCCTTGAAAAACC
BrVQ11-1	F: GAAGAGCAAAAAGCCATCGC
	R: AGTGCCGTTAGGAGAAGAAAGAG
BrVQ11-2	F: GGACAATAAAGAGCAAAAGG
	R: CAGTCCGTTGATTAGTGGC
BrVQ11-3	F: TGAGCCCACAGTCAGCACG
	R: TGAGGAAACAAAGGCAAAAGC
BrVQ12	F: TCTAGTTGAGGTTAGGCAGCCACTC
	R: ATTCGCAGAACTGAGAAGAGGG
BrVQ14-1	F: AGTAGTGGACCTGGGGATGG
	R: TTGGACTTGGGACTGGGAAT
BrVQ14-2	F: TCCACAACCACTTAACCCGAAC
	R: TAACCACCCCATCTTGGACTTG
BrVQ14-3	F: TATGGCACCTCAGGCTCAGACT
	R: GGCTGGGAGGGAAGATTACGA
BrVQ15	F: TCGGTGCTTTTCACTCCCAT
	R: GTGATGGTTAGTTAGAAATGCTGATG
BrVQ16-1	F: CGCCAAAGATCCTCACAAGA
	R: ACCCAGACGAGAAAAACGCA
BrVQ16-2	F: TGAGTATTATTCACCGCTGGATG
	R: TGCTCCCTAAGGCATTCACATT
BrVQ18-1	F: CATAAGCGTACTTCCAACACAAAC
	R: AAGAAGATCTCACGGGAAACGA
BrVQ18-2	F: AAAAGGAGTGCCAGACCGA
	R: CTCATAGGAAACGAAGAGAAGTA
BrVQ19-1	F: TCGGAGGAAGAGAGAGCGAT
	R: ACAGGAAACAGCGGCAAAAG
BrVQ19-2	F: TGACGCCGCTGAAACACG
	R: TCTCGGAGACCGATGCAAGT
BrVQ20	F: TGTTTCTCCATTTCCTCATCCT
	R: GCCATCAAACCCAGAAGAGG
BrVQ21-1	F: GGCTAAAGATGAGACGGTGGAG
	R: GCAAAACCAAACGGGCTCA
BrVQ21-2	F: GCTAAAGAAGAGACGGTGGAAA
	R: TGACTACTAAAGACATCAGCAAACG
BrVQ21-3	F: GGCTATGTTACCGACCGTTCC
	R: TCTCGATCCCAAATGTGACTGA
BrVQ22-1	F: CACCGCAACGGCCTTATAT
	R: CCCAAACACACCGGGAAC
BrVQ22-2	F: CGCTATGTCTTTCGGGTCAG
	R: TACCCAACGACGGGATTCAT
BrVQ23-1	F: CTCCACCGTCTCCGACCTCA
	R: AAAATCCAGAAAAACCTGCCGA
BrVQ23-2	F: TGGGGAAGAGATGTTTGTGTCG
	R: CATAGATCGATTTTTCCAAAGCC
BrVQ23-3	F: GCTTGAGCCCGAGTTTTCC
	R: AGAACATCTCTTCCCCATCCAA
BrVQ24-1	F: CCCACGGCTTTTTTGCTCC
	R: CGGGTAACTATCCAACTCCACG
BrVQ24-2	F: CTACCACCACCGTCGTCCTCG
	R: AGCCACCGCCACCACTAACA
BrVQ25-1	F: CGATGACTTGGAACGGTAAC
	R: ACACGAACTGGTTGTGAGAATC
BrVQ25-2	F: TTGGCACGGTGGTAATAACTGT
	R: TGTAAATGCGAGGAAGAAGACG
BrVQ26-1	F: AGCCTCCACCTCAAGAATCC
	R: TGAGAATATGTTGTCGTCTTCGTC
BrVQ26-2	F: AGAATCAGGCAAAGAACATACGG
	R: ATCAATCAAACCATCTAAATCAAAAT
BrVQ26-3	F: AGATACTCTACGGGTCAGGC
	R: ATAATGGATGGCTTGTTGG
BrVQ27	F: GTCGGCTATCAGTACGCTAATTT
	R: CCTCCTCTTCCACCGTCTCTA
BrVQ28	F: GGTGAAGAAAGTAACTCCGTGT
	R: TCCGTCGCTTGGTGAAAAT
BrVQ29-1	F: TGGCTAACCCGTTCAAGAGTTT
	R: TGCAGGATTCCGAAGTGATAAG
BrVQ29-2	F: CAAGAGTTTTGATGATTTGGCA
	R: GGAGAGATTTGCAGGAGTTTGA
BrVQ30-1	F: CGTCTCCTCTCCTATCCG
	R: TTCCCGTTAGCCACTGC
BrVQ30-2	F: TCGCTCAAAAACTCCTCCCAA
	R: TGCAACATACCAAGACCAAACTG
BrVQ31	F: CATTGGTCTCTAACTTGTCCTTGA
	R: AGTAAGCAACGCTGGCTCTGT
BrVQ32-1	F: TCAAGCCCTGTTGGAAACC
	R: CGGAGGTAGCGGTTCGTT
BrVQ32-2	F: TGTCTCCGACGCCAAGATC
	R: TGAGCAAAGGGAAGAAAAAGC
BrVQ33-1	F: CACCCATCAAGAAAACCAACAG
	R: GTTGAAGGGGTCATTGTTGCT
BrVQ33-2	F: CCCAAAGCTAGGGCTAAACAG
	R: GAGAAGTAACCGGAAAAAGAGGA
BrVQ34-1	F: ATCAGTGGAGAAGAGCAACCTATG
	R: ACCTTCATTTCTCACATCCGTTAT
BrVQ34-2	F: CATCAACGAGTCATCCTTACCT
	R: CATAGTATTTAGGGTTGGCTGC
BrVQ34-3	F: GGCACAGCCAACCCTAAACA
	R: TTATTCTCCGATCCAGAAGCAA
BrVQ35	F: ATTCAAAGGAAGCCCACTTCTA
	R: GGATCTGCTTTATCTCCGTCAG
Actin	F: GCTTACGTCGCTCTTGACTACG
	R: GATGGTGATGACTTGTCCATCAG
F: the upstream of BrVQ gene special primers; R: the downstream of BrVQ gene special primers.
